# Supplementary material for: A GBAS marker system for assessing genetic diversity and population differentiation in Norway Spruce
Source: Research Square preprint supplement (doi:10.21203/rs.3.rs-7722464/v1), 2025-10-17
Supplement: Supplementary file 1 [file 6547ea8c6ce81e602e8e4833.xlsx]

## Sheet: Combined
samples		SPRU100_TTTTC	SPRU100_TTTTC	SPRU101_TGTTA	SPRU101_TGTTA	SPRU102_TTCTT	SPRU102_TTCTT	SPRU105_TTCTT	SPRU105_TTCTT	SPRU106_TTTTG	SPRU106_TTTTG	SPRU107_AGATA	SPRU107_AGATA	SPRU109_TTATC	SPRU109_TTATC	SPRU110_AATAC	SPRU110_AATAC	SPRU113_AAAAG	SPRU113_AAAAG	SPRU114_TTTTA	SPRU114_TTTTA	SPRU116_AGATA	SPRU116_AGATA	SPRU118_TTTTC	SPRU118_TTTTC	SPRU121_ATTTT	SPRU121_ATTTT	SPRU123_CTTCT	SPRU123_CTTCT	SPRU18_TTTCC	SPRU18_TTTCC	SPRU19_CATCA	SPRU19_CATCA	SPRU20_ATTT	SPRU20_ATTT	SPRU23_ATG	SPRU23_ATG	SPRU24dup2_AGA	SPRU24dup2_AGA	SPRU32dup2_AAT	SPRU32dup2_AAT	SPRU33_TTC	SPRU33_TTC	SPRU35_TAAAA	SPRU35_TAAAA	SPRU38_GATA	SPRU38_GATA	SPRU39_CATG	SPRU39_CATG
2210	HigherMuhr	10	10	11	11	17	20	0	0	0	0	13	21	7	7	34	8	0	0	13	6	14	21	22	22	34	34	70	70	0	0	0	0	40	40	3	3	22	7	45	45	0	0	0	0	13	4	11	22
2211	HigherMuhr	10	13	24	24	11	17	0	0	132	135	32	32	8	8	19	34	39	39	13	26	21	35	9	9	4	41	0	0	0	0	0	0	89	89	0	0	11	19	11	11	0	0	0	0	6	6	11	11
2212	HigherMuhr	10	10	59	59	17	20	0	0	0	0	1	10	7	7	19	19	39	39	13	2	17	18	22	9	27	58	70	70	0	0	0	0	89	89	9	9	19	19	11	33	0	0	0	0	0	0	11	11
2213	HigherMuhr	10	10	54	54	17	20	0	0	54	54	31	32	7	7	24	34	39	6	13	6	17	46	35	35	19	41	15	72	0	0	0	0	115	39	3	3	19	19	11	38	0	0	0	0	0	0	11	11
2214	HigherMuhr	10	13	32	64	17	4	0	0	0	0	13	8	10	10	20	22	39	39	13	13	49	58	23	35	19	41	48	66	0	0	0	0	89	89	3	9	19	19	18	18	7	7	25	87	21	21	11	22
2215	HigherMuhr	10	10	28	28	16	17	6	6	119	28	31	8	7	7	21	8	6	6	10	22	21	49	22	22	22	7	72	72	0	0	0	0	109	8	13	9	19	19	11	29	7	7	0	0	0	0	24	24
2216	HigherMuhr	11	6	28	58	15	20	6	6	17	38	13	32	4	4	35	47	14	6	11	13	17	7	15	9	10	41	31	67	0	0	0	0	59	99	9	9	7	7	11	38	0	0	0	0	39	39	11	22
2217	HigherMuhr	10	10	29	51	15	17	0	0	52	86	13	38	7	7	18	8	6	6	13	13	35	40	22	22	19	28	38	38	0	0	0	0	59	69	3	9	19	8	21	38	0	0	0	0	0	0	11	11
2218	HigherMuhr	10	10	19	40	16	17	6	6	127	22	13	8	7	7	19	34	15	15	13	22	31	38	22	9	41	52	72	72	0	0	0	0	28	89	16	3	19	19	11	11	0	0	0	0	39	39	11	22
2219	HigherMuhr	10	10	12	51	11	17	6	6	0	0	1	10	7	7	22	22	0	0	11	22	18	9	21	9	24	27	22	22	0	0	0	0	112	76	0	0	22	22	11	33	0	0	0	0	25	25	11	24
2220	HigherMuhr	10	10	25	64	17	17	6	6	17	91	13	3	7	7	18	32	3	5	22	22	24	59	35	35	27	41	17	17	0	0	0	0	118	118	16	16	19	7	42	45	0	0	0	0	0	0	11	11
2221	HigherMuhr	10	10	20	20	17	17	6	6	0	0	31	31	1	17	18	34	8	8	13	13	47	49	33	35	19	55	46	46	0	0	0	0	63	64	0	0	19	7	11	11	0	0	0	0	39	39	11	11
2222	HigherMuhr	10	13	12	64	17	17	6	6	114	127	21	38	7	7	15	22	39	39	13	26	21	34	35	9	15	34	17	17	0	0	0	0	65	99	16	16	17	19	21	29	0	0	0	0	0	0	11	14
2223	HigherMuhr	10	10	28	28	10	17	0	0	74	74	13	26	10	7	32	41	18	39	13	13	49	49	21	9	41	41	72	72	0	0	0	0	115	56	0	0	19	19	11	38	0	0	0	0	0	0	11	11
2224	HigherMuhr	10	11	24	24	17	4	0	0	119	83	32	32	7	7	32	40	18	3	13	13	21	9	9	9	25	41	63	63	0	0	0	0	11	76	3	9	13	19	11	21	15	15	25	87	0	0	11	14
2197	LowerMuhr	10	4	11	56	17	23	0	0	98	98	10	8	7	7	54	54	12	12	11	7	55	6	22	33	19	4	29	56	0	0	0	0	105	64	0	0	19	19	11	18	6	6	0	0	18	18	14	22
2198	LowerMuhr	10	13	59	59	17	27	0	0	54	54	13	32	7	7	15	34	6	6	13	20	21	38	35	9	19	27	0	0	0	0	0	0	29	63	3	3	19	19	11	38	7	7	0	0	21	21	11	11
2199	LowerMuhr	10	10	51	51	16	17	0	0	119	119	8	8	7	7	15	32	39	39	13	22	21	52	35	35	50	6	48	48	0	0	0	0	43	64	9	9	19	19	11	45	0	0	0	0	25	34	11	22
2200	LowerMuhr	10	13	51	67	20	20	6	6	115	54	13	8	7	7	36	48	35	6	13	13	46	46	22	22	19	41	66	66	0	0	0	0	63	82	0	0	22	22	11	11	0	0	0	0	25	25	11	11
2201	LowerMuhr	10	10	11	64	17	26	0	0	0	0	21	31	7	7	22	38	0	0	13	22	35	49	22	9	14	60	15	22	0	0	0	0	130	131	16	9	19	19	33	38	0	0	0	0	39	39	11	14
2202	LowerMuhr	10	10	11	28	16	27	6	6	0	0	21	38	7	7	48	8	39	39	10	13	26	58	14	14	41	41	0	0	0	0	0	0	15	60	0	0	19	19	11	11	2	2	0	0	39	39	11	15
2203	LowerMuhr	10	4	58	58	17	20	0	0	135	144	32	33	7	7	22	34	20	20	11	13	49	58	22	9	19	19	56	56	0	0	0	0	63	65	0	0	17	7	11	11	0	0	0	0	13	13	11	11
2204	LowerMuhr	10	13	64	64	16	4	6	6	82	85	10	35	7	7	34	46	39	39	13	13	21	34	22	35	19	41	29	29	0	0	0	0	109	7	9	9	19	7	9	9	0	0	0	0	0	0	11	22
2205	LowerMuhr	10	10	54	58	17	27	0	0	53	76	31	31	10	10	22	34	6	6	13	22	17	49	13	13	28	28	2	3	0	0	0	0	40	69	9	9	11	19	11	11	6	6	0	0	39	39	11	22
2206	LowerMuhr	10	13	51	67	20	20	6	6	115	54	13	8	7	7	36	48	35	6	13	13	46	46	22	22	19	41	66	66	0	0	0	0	63	82	0	0	22	22	11	11	0	0	0	0	25	25	11	11
2207	LowerMuhr	10	9	42	51	17	20	6	6	102	102	11	16	7	7	15	34	6	6	16	22	21	34	22	22	41	52	22	66	0	0	0	0	83	89	3	3	19	19	12	12	15	15	0	0	0	0	11	22
2208	LowerMuhr	10	9	42	51	17	20	6	6	102	102	11	16	7	7	15	34	6	6	16	22	21	34	22	22	41	52	22	63	0	0	0	0	83	99	3	3	19	19	11	12	15	15	0	0	0	0	11	22
2209	LowerMuhr	10	10	50	64	17	20	0	0	17	76	13	14	7	7	34	34	18	19	13	13	35	49	21	9	15	9	48	48	0	0	0	0	134	36	16	16	19	22	11	11	0	0	0	0	23	23	12	20
2770	Rothwald	10	10	32	51	20	28	2	2	0	0	31	8	7	7	8	8	26	27	13	13	49	58	35	35	27	9	15	15	47	6	1	9	43	72	0	0	19	19	11	38	0	0	0	0	25	25	11	14
2771	Rothwald	10	11	24	24	17	17	0	0	51	51	13	8	7	7	14	15	0	0	13	13	35	8	22	9	7	72	70	70	0	0	0	0	15	43	8	9	19	4	0	0	0	0	0	0	18	18	11	5
2792	Rothwald	10	10	11	11	17	17	0	0	119	119	13	13	7	7	22	34	0	0	13	13	46	49	22	9	56	73	10	10	0	0	0	0	40	51	0	0	19	7	0	0	0	0	0	0	0	0	11	11
2793	Rothwald	10	13	12	29	17	17	0	0	0	0	32	8	0	0	19	19	39	39	13	17	18	7	36	36	19	41	56	56	0	0	0	0	109	90	0	0	0	0	0	0	0	0	0	0	0	0	22	22
2796	Rothwald	10	10	24	24	17	17	6	6	0	0	1	32	7	7	21	34	20	20	22	22	21	49	22	9	81	81	3	3	10	6	10	14	133	65	0	0	19	19	35	38	0	0	9	9	18	18	11	11
2798	Rothwald	10	10	25	64	16	20	0	0	0	0	13	13	0	0	22	47	0	0	13	13	49	49	0	0	27	27	0	0	0	0	0	0	133	71	0	0	0	0	40	40	0	0	0	0	0	0	0	0
2799	Rothwald	10	10	15	51	17	4	0	0	0	0	21	31	7	7	15	15	6	6	10	12	49	9	0	0	15	17	48	70	0	0	0	0	162	43	9	9	0	0	0	0	0	0	0	0	24	24	11	11
2803	Rothwald	11	13	29	66	0	0	0	0	19	51	10	13	18	2	22	32	3	3	13	6	49	49	18	9	7	7	38	43	9	9	10	11	78	93	0	0	22	7	11	14	15	15	17	17	0	0	11	26
2815	Rothwald	13	13	51	59	17	17	6	6	170	57	13	14	0	0	19	8	20	39	13	13	17	35	9	9	27	60	22	63	22	34	10	11	25	89	3	3	19	2	11	11	1	1	0	0	23	23	22	22
2817	Rothwald	10	10	29	45	17	17	0	0	0	0	13	31	0	0	15	15	39	5	13	22	48	49	22	22	27	78	0	0	0	0	0	0	0	0	16	16	19	19	0	0	0	0	0	0	23	23	11	22
2823	Rothwald	10	10	51	59	17	17	0	0	0	0	33	9	7	7	22	47	20	20	11	22	1	49	13	13	19	41	48	54	0	0	0	0	169	64	0	0	19	19	0	0	0	0	0	0	0	0	11	11
2824	Rothwald	10	13	30	54	17	28	0	0	0	0	16	8	7	7	32	48	0	0	13	13	49	49	20	35	19	70	16	67	0	0	0	0	117	22	0	0	19	19	0	0	0	0	0	0	23	23	11	22
2825	Rothwald	10	10	51	51	16	16	0	0	97	97	13	13	0	0	19	21	0	0	13	13	18	49	0	0	10	19	38	38	0	0	0	0	0	0	9	9	19	19	11	38	0	0	0	0	0	0	2	22
2826	Rothwald	10	13	51	51	16	20	6	6	0	0	13	13	0	0	34	8	5	5	13	13	21	62	13	9	52	81	58	58	6	6	10	11	111	49	3	9	17	19	11	18	0	0	0	0	0	0	14	14
2857	Rothwald	10	13	28	54	17	17	0	0	0	0	1	13	0	0	21	22	0	0	13	22	17	58	35	9	56	79	38	38	37	37	0	0	104	96	0	0	19	19	11	38	0	0	0	0	0	0	11	11
2858	Rothwald	10	10	11	12	16	17	0	0	73	76	1	13	0	0	22	32	39	39	13	13	18	21	9	9	27	7	16	16	10	9	10	11	151	39	0	0	19	19	15	21	0	0	0	0	0	0	11	2
2866	Rothwald	10	10	30	51	17	20	0	0	17	17	10	31	7	7	47	9	20	20	13	26	17	44	22	22	41	7	52	52	2	2	21	9	115	157	3	3	19	7	45	50	0	0	1	1	0	0	11	22
2867	Rothwald	10	11	28	51	17	17	0	0	0	0	31	31	7	7	15	22	0	0	13	6	18	21	35	35	56	56	55	63	0	0	0	0	38	54	0	0	19	19	0	0	0	0	0	0	0	0	11	14
2868	Rothwald	10	10	24	28	16	17	0	0	0	0	0	0	7	7	32	32	0	0	13	22	38	43	0	0	27	42	0	0	0	0	0	0	0	0	0	0	0	0	0	0	0	0	0	0	0	0	11	11
2870	Rothwald	3	9	11	64	17	20	0	0	17	17	21	32	7	7	22	22	6	6	13	22	7	7	22	22	12	41	0	0	10	10	10	10	80	89	16	16	13	19	11	11	0	0	17	6	13	13	11	11
2871	Rothwald	11	3	32	59	14	17	6	6	102	48	10	13	16	7	15	43	10	30	13	13	49	49	27	35	17	52	67	67	10	8	10	24	0	0	9	9	19	19	38	38	0	0	0	0	0	0	11	14
2872	Rothwald	10	13	24	59	17	17	0	0	0	0	21	31	7	7	43	48	10	10	13	13	18	58	22	35	41	41	38	63	6	8	10	10	43	89	9	9	17	7	11	38	0	0	0	0	30	30	11	11
2879	Rothwald	10	11	59	59	17	36	0	0	43	53	17	31	0	0	32	53	39	39	13	13	19	46	22	27	12	52	29	38	6	6	10	10	119	128	9	9	19	21	11	38	6	6	0	0	38	38	11	22
2880	Rothwald	10	10	59	73	17	17	0	0	102	61	13	8	7	7	21	23	6	6	13	13	18	21	22	9	12	41	10	52	8	9	10	9	0	0	0	0	19	19	18	38	4	4	0	0	39	39	11	11
2908	Rothwald	10	8	64	64	16	17	6	6	116	20	13	31	7	8	8	8	12	12	13	13	18	34	22	22	22	41	38	55	5	5	10	11	115	128	13	13	19	19	11	45	1	1	0	0	25	25	11	11
2909	Rothwald	11	13	11	12	17	20	0	0	0	0	13	13	7	7	21	21	18	22	13	13	35	60	13	35	19	41	27	56	2	2	10	17	106	89	19	19	19	19	11	20	0	0	0	0	21	21	11	14
2911	Rothwald	10	3	11	8	16	17	0	0	0	0	13	13	7	7	22	36	20	20	13	26	49	53	22	22	22	60	0	0	6	6	10	21	0	0	16	16	17	7	18	38	0	0	0	0	0	0	11	11
2927	Rothwald	10	10	11	11	17	27	0	0	0	0	31	32	7	7	0	0	12	12	13	13	18	49	9	9	15	41	70	70	0	0	0	0	0	0	0	0	0	0	0	0	0	0	0	0	0	0	0	0
1834	Flurwald,Vorarlberg	10	10	51	58	17	20	6	6	43	69	31	31	7	7	14	14	22	22	13	26	35	57	9	9	11	41	63	63	0	0	0	0	0	0	16	16	19	7	45	45	0	0	0	0	0	0	11	11
1835	Flurwald,Vorarlberg	10	4	11	59	16	17	6	6	0	0	14	3	7	7	19	34	39	39	13	26	21	58	22	9	27	70	13	22	0	0	0	0	0	0	16	16	14	19	1	33	0	0	75	75	30	30	11	22
1836	Flurwald,Vorarlberg	10	11	11	59	17	17	0	0	39	76	33	33	10	7	2	22	37	37	13	26	53	58	22	9	27	7	13	22	0	0	10	10	86	89	16	16	1	19	33	45	0	0	59	78	30	30	11	11
1837	Flurwald,Vorarlberg	10	10	51	59	16	17	0	0	4	5	18	3	7	7	1	18	10	10	13	13	18	21	13	22	17	19	15	52	0	0	0	0	42	86	9	9	19	7	29	29	0	0	47	9	30	30	11	11
1838	Flurwald,Vorarlberg	13	4	24	54	17	20	6	6	5	76	3	33	7	7	22	34	6	6	13	26	18	18	13	22	41	60	22	63	0	0	0	0	59	93	0	0	0	0	0	0	0	0	0	0	21	21	11	11
1839	Flurwald,Vorarlberg	10	10	11	64	14	17	0	0	115	115	13	21	7	7	8	8	13	9	13	22	35	49	8	9	7	70	72	72	0	0	0	0	80	89	3	8	17	7	38	38	7	7	29	29	6	6	11	22
1840	Flurwald,Vorarlberg	10	10	25	51	13	17	0	0	2	2	21	32	1	17	31	8	22	39	15	2	21	49	22	9	28	41	48	48	0	0	0	0	58	89	14	3	19	7	18	18	0	0	0	0	6	6	11	11
1842	Flurwald,Vorarlberg	10	10	54	8	13	17	6	6	119	19	13	18	7	7	19	41	6	6	10	10	21	53	22	22	14	41	48	48	0	0	0	0	117	25	0	0	7	7	38	38	7	7	15	80	0	0	11	11
1843	Flurwald,Vorarlberg	10	13	51	54	17	20	6	6	125	76	13	33	10	10	34	54	6	6	13	26	18	35	22	22	41	41	15	22	0	0	12	6	43	59	0	0	2	2	37	37	7	7	0	0	21	21	11	14
1846	Silbertal,Vorarlberg	10	13	59	59	16	17	0	0	32	8	10	21	1	17	19	24	21	21	13	13	21	58	22	22	19	19	55	55	0	0	0	0	76	76	9	9	19	19	13	13	6	6	20	36	0	0	22	5
1847	Silbertal,Vorarlberg	10	10	59	59	16	17	6	6	106	54	10	32	7	7	21	32	20	3	13	22	44	9	9	9	24	34	25	25	0	0	0	0	12	13	4	9	11	19	11	33	0	0	80	80	6	6	11	22
1848	Silbertal,Vorarlberg	10	13	4	40	16	16	0	0	0	0	13	21	7	7	15	47	20	20	13	22	21	21	22	9	19	41	59	59	0	0	0	0	128	63	9	9	19	19	11	38	7	7	0	0	30	30	11	16
1849	Silbertal,Vorarlberg	10	13	64	64	17	17	0	0	135	61	11	11	7	7	19	22	3	3	13	22	46	58	18	22	19	34	13	13	0	0	0	0	0	0	0	0	11	19	14	45	7	7	4	4	13	13	11	11
1850	Silbertal,Vorarlberg	11	11	54	54	16	17	6	6	127	61	10	8	7	7	19	34	20	20	13	13	21	21	13	14	13	7	48	70	0	0	0	0	44	89	0	0	19	19	11	11	0	0	0	0	0	0	11	11
1851	Silbertal,Vorarlberg	10	11	25	64	14	4	0	0	106	64	13	13	1	17	53	54	32	32	13	13	38	49	2	35	19	19	48	55	0	0	0	0	0	0	3	3	19	19	11	7	0	0	0	0	13	21	11	11
1852	Silbertal,Vorarlberg	10	10	51	51	17	20	0	0	0	0	13	31	1	7	14	34	26	26	13	15	49	9	22	35	41	56	48	48	0	0	0	0	0	0	9	9	19	19	11	38	7	7	78	9	6	6	11	11
1853	Silbertal,Vorarlberg	10	10	50	59	16	16	6	6	102	115	10	31	1	7	32	32	10	10	13	13	21	58	2	23	22	41	38	67	0	0	0	0	0	0	0	0	0	0	11	11	7	7	28	9	39	39	11	11
1855	Silbertal,Vorarlberg	10	11	12	65	16	17	6	6	0	0	13	36	7	7	54	54	39	39	13	13	18	35	22	23	60	60	43	43	0	0	0	0	37	64	0	0	17	19	11	15	0	0	0	0	9	9	11	4
[truncated: 136 more columns]

## Sheet: SSR
samples		SPRU100_TTTTC	SPRU100_TTTTC	SPRU101_TGTTA	SPRU101_TGTTA	SPRU102_TTCTT	SPRU102_TTCTT	SPRU105_TTCTT	SPRU105_TTCTT	SPRU106_TTTTG	SPRU106_TTTTG	SPRU107_AGATA	SPRU107_AGATA	SPRU109_TTATC	SPRU109_TTATC	SPRU110_AATAC	SPRU110_AATAC	SPRU113_AAAAG	SPRU113_AAAAG	SPRU114_TTTTA	SPRU114_TTTTA	SPRU116_AGATA	SPRU116_AGATA	SPRU118_TTTTC	SPRU118_TTTTC	SPRU121_ATTTT	SPRU121_ATTTT	SPRU123_CTTCT	SPRU123_CTTCT	SPRU18_TTTCC	SPRU18_TTTCC	SPRU19_CATCA	SPRU19_CATCA	SPRU20_ATTT	SPRU20_ATTT	SPRU23_ATG	SPRU23_ATG	SPRU24dup2_AGA	SPRU24dup2_AGA	SPRU32dup2_AAT	SPRU32dup2_AAT	SPRU33_TTC	SPRU33_TTC	SPRU35_TAAAA	SPRU35_TAAAA	SPRU38_GATA	SPRU38_GATA	SPRU39_CATG	SPRU39_CATG
2210	HigherMuhr	10	10	11	11	17	20	0	0	0	0	13	21	7	7	34	8	0	0	13	6	14	21	22	22	34	34	70	70	0	0	0	0	40	40	3	3	22	7	45	45	0	0	0	0	13	4	11	22
2211	HigherMuhr	10	13	24	24	11	17	0	0	132	135	32	32	8	8	19	34	39	39	13	26	21	35	9	9	4	41	0	0	0	0	0	0	89	89	0	0	11	19	11	11	0	0	0	0	6	6	11	11
2212	HigherMuhr	10	10	59	59	17	20	0	0	0	0	1	10	7	7	19	19	39	39	13	2	17	18	22	9	27	58	70	70	0	0	0	0	89	89	9	9	19	19	11	33	0	0	0	0	0	0	11	11
2213	HigherMuhr	10	10	54	54	17	20	0	0	54	54	31	32	7	7	24	34	39	6	13	6	17	46	35	35	19	41	15	72	0	0	0	0	115	39	3	3	19	19	11	38	0	0	0	0	0	0	11	11
2214	HigherMuhr	10	13	32	64	17	4	0	0	0	0	13	8	10	10	20	22	39	39	13	13	49	58	23	35	19	41	48	66	0	0	0	0	89	89	3	9	19	19	18	18	7	7	25	87	21	21	11	22
2215	HigherMuhr	10	10	28	28	16	17	6	6	119	28	31	8	7	7	21	8	6	6	10	22	21	49	22	22	22	7	72	72	0	0	0	0	109	8	13	9	19	19	11	29	7	7	0	0	0	0	24	24
2216	HigherMuhr	11	6	28	58	15	20	6	6	17	38	13	32	4	4	35	47	14	6	11	13	17	7	15	9	10	41	31	67	0	0	0	0	59	99	9	9	7	7	11	38	0	0	0	0	39	39	11	22
2217	HigherMuhr	10	10	29	51	15	17	0	0	52	86	13	38	7	7	18	8	6	6	13	13	35	40	22	22	19	28	38	38	0	0	0	0	59	69	3	9	19	8	21	38	0	0	0	0	0	0	11	11
2218	HigherMuhr	10	10	19	40	16	17	6	6	127	22	13	8	7	7	19	34	15	15	13	22	31	38	22	9	41	52	72	72	0	0	0	0	28	89	16	3	19	19	11	11	0	0	0	0	39	39	11	22
2219	HigherMuhr	10	10	12	51	11	17	6	6	0	0	1	10	7	7	22	22	0	0	11	22	18	9	21	9	24	27	22	22	0	0	0	0	112	76	0	0	22	22	11	33	0	0	0	0	25	25	11	24
2220	HigherMuhr	10	10	25	64	17	17	6	6	17	91	13	3	7	7	18	32	3	5	22	22	24	59	35	35	27	41	17	17	0	0	0	0	118	118	16	16	19	7	42	45	0	0	0	0	0	0	11	11
2221	HigherMuhr	10	10	20	20	17	17	6	6	0	0	31	31	1	17	18	34	8	8	13	13	47	49	33	35	19	55	46	46	0	0	0	0	63	64	0	0	19	7	11	11	0	0	0	0	39	39	11	11
2222	HigherMuhr	10	13	12	64	17	17	6	6	114	127	21	38	7	7	15	22	39	39	13	26	21	34	35	9	15	34	17	17	0	0	0	0	65	99	16	16	17	19	21	29	0	0	0	0	0	0	11	14
2223	HigherMuhr	10	10	28	28	10	17	0	0	74	74	13	26	10	7	32	41	18	39	13	13	49	49	21	9	41	41	72	72	0	0	0	0	115	56	0	0	19	19	11	38	0	0	0	0	0	0	11	11
2224	HigherMuhr	10	11	24	24	17	4	0	0	119	83	32	32	7	7	32	40	18	3	13	13	21	9	9	9	25	41	63	63	0	0	0	0	11	76	3	9	13	19	11	21	15	15	25	87	0	0	11	14
2197	LowerMuhr	10	4	11	56	17	23	0	0	98	98	10	8	7	7	54	54	12	12	11	7	55	6	22	33	19	4	29	56	0	0	0	0	105	64	0	0	19	19	11	18	6	6	0	0	18	18	14	22
2198	LowerMuhr	10	13	59	59	17	27	0	0	54	54	13	32	7	7	15	34	6	6	13	20	21	38	35	9	19	27	0	0	0	0	0	0	29	63	3	3	19	19	11	38	7	7	0	0	21	21	11	11
2199	LowerMuhr	10	10	51	51	16	17	0	0	119	119	8	8	7	7	15	32	39	39	13	22	21	52	35	35	50	6	48	48	0	0	0	0	43	64	9	9	19	19	11	45	0	0	0	0	25	34	11	22
2200	LowerMuhr	10	13	51	67	20	20	6	6	115	54	13	8	7	7	36	48	35	6	13	13	46	46	22	22	19	41	66	66	0	0	0	0	63	82	0	0	22	22	11	11	0	0	0	0	25	25	11	11
2201	LowerMuhr	10	10	11	64	17	26	0	0	0	0	21	31	7	7	22	38	0	0	13	22	35	49	22	9	14	60	15	22	0	0	0	0	130	131	16	9	19	19	33	38	0	0	0	0	39	39	11	14
2202	LowerMuhr	10	10	11	28	16	27	6	6	0	0	21	38	7	7	48	8	39	39	10	13	26	58	14	14	41	41	0	0	0	0	0	0	15	60	0	0	19	19	11	11	2	2	0	0	39	39	11	15
2203	LowerMuhr	10	4	58	58	17	20	0	0	135	144	32	33	7	7	22	34	20	20	11	13	49	58	22	9	19	19	56	56	0	0	0	0	63	65	0	0	17	7	11	11	0	0	0	0	13	13	11	11
2204	LowerMuhr	10	13	64	64	16	4	6	6	82	85	10	35	7	7	34	46	39	39	13	13	21	34	22	35	19	41	29	29	0	0	0	0	109	7	9	9	19	7	9	9	0	0	0	0	0	0	11	22
2205	LowerMuhr	10	10	54	58	17	27	0	0	53	76	31	31	10	10	22	34	6	6	13	22	17	49	13	13	28	28	2	3	0	0	0	0	40	69	9	9	11	19	11	11	6	6	0	0	39	39	11	22
2206	LowerMuhr	10	13	51	67	20	20	6	6	115	54	13	8	7	7	36	48	35	6	13	13	46	46	22	22	19	41	66	66	0	0	0	0	63	82	0	0	22	22	11	11	0	0	0	0	25	25	11	11
2207	LowerMuhr	10	9	42	51	17	20	6	6	102	102	11	16	7	7	15	34	6	6	16	22	21	34	22	22	41	52	22	66	0	0	0	0	83	89	3	3	19	19	12	12	15	15	0	0	0	0	11	22
2208	LowerMuhr	10	9	42	51	17	20	6	6	102	102	11	16	7	7	15	34	6	6	16	22	21	34	22	22	41	52	22	63	0	0	0	0	83	99	3	3	19	19	11	12	15	15	0	0	0	0	11	22
2209	LowerMuhr	10	10	50	64	17	20	0	0	17	76	13	14	7	7	34	34	18	19	13	13	35	49	21	9	15	9	48	48	0	0	0	0	134	36	16	16	19	22	11	11	0	0	0	0	23	23	12	20
2770	Rothwald	10	10	32	51	20	28	2	2	0	0	31	8	7	7	8	8	26	27	13	13	49	58	35	35	27	9	15	15	47	6	1	9	43	72	0	0	19	19	11	38	0	0	0	0	25	25	11	14
2771	Rothwald	10	11	24	24	17	17	0	0	51	51	13	8	7	7	14	15	0	0	13	13	35	8	22	9	7	72	70	70	0	0	0	0	15	43	8	9	19	4	0	0	0	0	0	0	18	18	11	5
2792	Rothwald	10	10	11	11	17	17	0	0	119	119	13	13	7	7	22	34	0	0	13	13	46	49	22	9	56	73	10	10	0	0	0	0	40	51	0	0	19	7	0	0	0	0	0	0	0	0	11	11
2793	Rothwald	10	13	12	29	17	17	0	0	0	0	32	8	0	0	19	19	39	39	13	17	18	7	36	36	19	41	56	56	0	0	0	0	109	90	0	0	0	0	0	0	0	0	0	0	0	0	22	22
2796	Rothwald	10	10	24	24	17	17	6	6	0	0	1	32	7	7	21	34	20	20	22	22	21	49	22	9	81	81	3	3	10	6	10	14	133	65	0	0	19	19	35	38	0	0	9	9	18	18	11	11
2798	Rothwald	10	10	25	64	16	20	0	0	0	0	13	13	0	0	22	47	0	0	13	13	49	49	0	0	27	27	0	0	0	0	0	0	133	71	0	0	0	0	40	40	0	0	0	0	0	0	0	0
2799	Rothwald	10	10	15	51	17	4	0	0	0	0	21	31	7	7	15	15	6	6	10	12	49	9	0	0	15	17	48	70	0	0	0	0	162	43	9	9	0	0	0	0	0	0	0	0	24	24	11	11
2803	Rothwald	11	13	29	66	0	0	0	0	19	51	10	13	18	2	22	32	3	3	13	6	49	49	18	9	7	7	38	43	9	9	10	11	78	93	0	0	22	7	11	14	15	15	17	17	0	0	11	26
2815	Rothwald	13	13	51	59	17	17	6	6	170	57	13	14	0	0	19	8	20	39	13	13	17	35	9	9	27	60	22	63	22	34	10	11	25	89	3	3	19	2	11	11	1	1	0	0	23	23	22	22
2817	Rothwald	10	10	29	45	17	17	0	0	0	0	13	31	0	0	15	15	39	5	13	22	48	49	22	22	27	78	0	0	0	0	0	0	0	0	16	16	19	19	0	0	0	0	0	0	23	23	11	22
2823	Rothwald	10	10	51	59	17	17	0	0	0	0	33	9	7	7	22	47	20	20	11	22	1	49	13	13	19	41	48	54	0	0	0	0	169	64	0	0	19	19	0	0	0	0	0	0	0	0	11	11
2824	Rothwald	10	13	30	54	17	28	0	0	0	0	16	8	7	7	32	48	0	0	13	13	49	49	20	35	19	70	16	67	0	0	0	0	117	22	0	0	19	19	0	0	0	0	0	0	23	23	11	22
2825	Rothwald	10	10	51	51	16	16	0	0	97	97	13	13	0	0	19	21	0	0	13	13	18	49	0	0	10	19	38	38	0	0	0	0	0	0	9	9	19	19	11	38	0	0	0	0	0	0	2	22
2826	Rothwald	10	13	51	51	16	20	6	6	0	0	13	13	0	0	34	8	5	5	13	13	21	62	13	9	52	81	58	58	6	6	10	11	111	49	3	9	17	19	11	18	0	0	0	0	0	0	14	14
2857	Rothwald	10	13	28	54	17	17	0	0	0	0	1	13	0	0	21	22	0	0	13	22	17	58	35	9	56	79	38	38	37	37	0	0	104	96	0	0	19	19	11	38	0	0	0	0	0	0	11	11
2858	Rothwald	10	10	11	12	16	17	0	0	73	76	1	13	0	0	22	32	39	39	13	13	18	21	9	9	27	7	16	16	10	9	10	11	151	39	0	0	19	19	15	21	0	0	0	0	0	0	11	2
2866	Rothwald	10	10	30	51	17	20	0	0	17	17	10	31	7	7	47	9	20	20	13	26	17	44	22	22	41	7	52	52	2	2	21	9	115	157	3	3	19	7	45	50	0	0	1	1	0	0	11	22
2867	Rothwald	10	11	28	51	17	17	0	0	0	0	31	31	7	7	15	22	0	0	13	6	18	21	35	35	56	56	55	63	0	0	0	0	38	54	0	0	19	19	0	0	0	0	0	0	0	0	11	14
2868	Rothwald	10	10	24	28	16	17	0	0	0	0	0	0	7	7	32	32	0	0	13	22	38	43	0	0	27	42	0	0	0	0	0	0	0	0	0	0	0	0	0	0	0	0	0	0	0	0	11	11
2870	Rothwald	3	9	11	64	17	20	0	0	17	17	21	32	7	7	22	22	6	6	13	22	7	7	22	22	12	41	0	0	10	10	10	10	80	89	16	16	13	19	11	11	0	0	17	6	13	13	11	11
2871	Rothwald	11	3	32	59	14	17	6	6	102	48	10	13	16	7	15	43	10	30	13	13	49	49	27	35	17	52	67	67	10	8	10	24	0	0	9	9	19	19	38	38	0	0	0	0	0	0	11	14
2872	Rothwald	10	13	24	59	17	17	0	0	0	0	21	31	7	7	43	48	10	10	13	13	18	58	22	35	41	41	38	63	6	8	10	10	43	89	9	9	17	7	11	38	0	0	0	0	30	30	11	11
2879	Rothwald	10	11	59	59	17	36	0	0	43	53	17	31	0	0	32	53	39	39	13	13	19	46	22	27	12	52	29	38	6	6	10	10	119	128	9	9	19	21	11	38	6	6	0	0	38	38	11	22
2880	Rothwald	10	10	59	73	17	17	0	0	102	61	13	8	7	7	21	23	6	6	13	13	18	21	22	9	12	41	10	52	8	9	10	9	0	0	0	0	19	19	18	38	4	4	0	0	39	39	11	11
2908	Rothwald	10	8	64	64	16	17	6	6	116	20	13	31	7	8	8	8	12	12	13	13	18	34	22	22	22	41	38	55	5	5	10	11	115	128	13	13	19	19	11	45	1	1	0	0	25	25	11	11
2909	Rothwald	11	13	11	12	17	20	0	0	0	0	13	13	7	7	21	21	18	22	13	13	35	60	13	35	19	41	27	56	2	2	10	17	106	89	19	19	19	19	11	20	0	0	0	0	21	21	11	14
2911	Rothwald	10	3	11	8	16	17	0	0	0	0	13	13	7	7	22	36	20	20	13	26	49	53	22	22	22	60	0	0	6	6	10	21	0	0	16	16	17	7	18	38	0	0	0	0	0	0	11	11
2927	Rothwald	10	10	11	11	17	27	0	0	0	0	31	32	7	7	0	0	12	12	13	13	18	49	9	9	15	41	70	70	0	0	0	0	0	0	0	0	0	0	0	0	0	0	0	0	0	0	0	0
1834	Flurwald,Vorarlberg	10	10	51	58	17	20	6	6	43	69	31	31	7	7	14	14	22	22	13	26	35	57	9	9	11	41	63	63	0	0	0	0	0	0	16	16	19	7	45	45	0	0	0	0	0	0	11	11
1835	Flurwald,Vorarlberg	10	4	11	59	16	17	6	6	0	0	14	3	7	7	19	34	39	39	13	26	21	58	22	9	27	70	13	22	0	0	0	0	0	0	16	16	14	19	1	33	0	0	75	75	30	30	11	22
1836	Flurwald,Vorarlberg	10	11	11	59	17	17	0	0	39	76	33	33	10	7	2	22	37	37	13	26	53	58	22	9	27	7	13	22	0	0	10	10	86	89	16	16	1	19	33	45	0	0	59	78	30	30	11	11
1837	Flurwald,Vorarlberg	10	10	51	59	16	17	0	0	4	5	18	3	7	7	1	18	10	10	13	13	18	21	13	22	17	19	15	52	0	0	0	0	42	86	9	9	19	7	29	29	0	0	47	9	30	30	11	11
1838	Flurwald,Vorarlberg	13	4	24	54	17	20	6	6	5	76	3	33	7	7	22	34	6	6	13	26	18	18	13	22	41	60	22	63	0	0	0	0	59	93	0	0	0	0	0	0	0	0	0	0	21	21	11	11
1839	Flurwald,Vorarlberg	10	10	11	64	14	17	0	0	115	115	13	21	7	7	8	8	13	9	13	22	35	49	8	9	7	70	72	72	0	0	0	0	80	89	3	8	17	7	38	38	7	7	29	29	6	6	11	22
1840	Flurwald,Vorarlberg	10	10	25	51	13	17	0	0	2	2	21	32	1	17	31	8	22	39	15	2	21	49	22	9	28	41	48	48	0	0	0	0	58	89	14	3	19	7	18	18	0	0	0	0	6	6	11	11
1842	Flurwald,Vorarlberg	10	10	54	8	13	17	6	6	119	19	13	18	7	7	19	41	6	6	10	10	21	53	22	22	14	41	48	48	0	0	0	0	117	25	0	0	7	7	38	38	7	7	15	80	0	0	11	11
1843	Flurwald,Vorarlberg	10	13	51	54	17	20	6	6	125	76	13	33	10	10	34	54	6	6	13	26	18	35	22	22	41	41	15	22	0	0	12	6	43	59	0	0	2	2	37	37	7	7	0	0	21	21	11	14
1846	Silbertal,Vorarlberg	10	13	59	59	16	17	0	0	32	8	10	21	1	17	19	24	21	21	13	13	21	58	22	22	19	19	55	55	0	0	0	0	76	76	9	9	19	19	13	13	6	6	20	36	0	0	22	5
1847	Silbertal,Vorarlberg	10	10	59	59	16	17	6	6	106	54	10	32	7	7	21	32	20	3	13	22	44	9	9	9	24	34	25	25	0	0	0	0	12	13	4	9	11	19	11	33	0	0	80	80	6	6	11	22
1848	Silbertal,Vorarlberg	10	13	4	40	16	16	0	0	0	0	13	21	7	7	15	47	20	20	13	22	21	21	22	9	19	41	59	59	0	0	0	0	128	63	9	9	19	19	11	38	7	7	0	0	30	30	11	16
1849	Silbertal,Vorarlberg	10	13	64	64	17	17	0	0	135	61	11	11	7	7	19	22	3	3	13	22	46	58	18	22	19	34	13	13	0	0	0	0	0	0	0	0	11	19	14	45	7	7	4	4	13	13	11	11
1850	Silbertal,Vorarlberg	11	11	54	54	16	17	6	6	127	61	10	8	7	7	19	34	20	20	13	13	21	21	13	14	13	7	48	70	0	0	0	0	44	89	0	0	19	19	11	11	0	0	0	0	0	0	11	11
1851	Silbertal,Vorarlberg	10	11	25	64	14	4	0	0	106	64	13	13	1	17	53	54	32	32	13	13	38	49	2	35	19	19	48	55	0	0	0	0	0	0	3	3	19	19	11	7	0	0	0	0	13	21	11	11
1852	Silbertal,Vorarlberg	10	10	51	51	17	20	0	0	0	0	13	31	1	7	14	34	26	26	13	15	49	9	22	35	41	56	48	48	0	0	0	0	0	0	9	9	19	19	11	38	7	7	78	9	6	6	11	11
1853	Silbertal,Vorarlberg	10	10	50	59	16	16	6	6	102	115	10	31	1	7	32	32	10	10	13	13	21	58	2	23	22	41	38	67	0	0	0	0	0	0	0	0	0	0	11	11	7	7	28	9	39	39	11	11
1855	Silbertal,Vorarlberg	10	11	12	65	16	17	6	6	0	0	13	36	7	7	54	54	39	39	13	13	18	35	22	23	60	60	43	43	0	0	0	0	37	64	0	0	17	19	11	15	0	0	0	0	9	9	11	4
[truncated: 20 more columns]

## Sheet: EPIC
samples		1-SprEPIC_	1-SprEPIC_	12-SprEPIC_	12-SprEPIC_	16-SprEPICdup1_	16-SprEPICdup1_	16-SprEPICdup2_	16-SprEPICdup2_	16-SprEPICdup3_	16-SprEPICdup3_	17-SprEPICdup2_	17-SprEPICdup2_	18-SprEPIC_	18-SprEPIC_	19-SprEPIC_	19-SprEPIC_	2-SprEPIC_	2-SprEPIC_	20-SprEPIC_	20-SprEPIC_	22-SprEPIC_	22-SprEPIC_	23-SprEPIC_	23-SprEPIC_	24-SprEPICdup2_	24-SprEPICdup2_	25-SprEPIC_	25-SprEPIC_	26-SprEPIC_	26-SprEPIC_	27-SprEPIC_	27-SprEPIC_	3-SprEPIC_	3-SprEPIC_	30-SprEPIC_	30-SprEPIC_	31-SprEPIC_	31-SprEPIC_	32-SprEPIC_	32-SprEPIC_	33-SprEPIC_	33-SprEPIC_	36-SprEPIC_	36-SprEPIC_	37-SprEPIC_	37-SprEPIC_	4-SprEPIC_	4-SprEPIC_
2210	HigherMuhr	11	15	13	7	4	4	33	35	21	29	0	0	11	8	13	15	12	12	1	11	5	5	12	12	16	19	8	9	14	4	15	15	21	24	5	5	14	14	13	13	2	20	0	0	28	30	24	34
2211	HigherMuhr	59	71	13	13	3	4	35	8	21	22	4	41	11	8	15	15	12	12	11	7	4	5	25	5	12	14	9	9	16	8	15	15	21	24	5	5	14	6	13	7	20	20	13	15	28	28	28	50
2212	HigherMuhr	23	28	18	7	3	4	0	0	25	44	43	65	11	8	13	15	14	14	11	6	5	5	12	8	14	14	9	9	14	14	15	15	21	21	5	5	14	14	13	13	20	9	15	21	28	30	28	28
2213	HigherMuhr	47	59	10	7	0	0	25	8	45	45	0	0	11	11	15	6	12	12	1	6	5	5	12	33	14	14	9	9	0	0	15	15	10	19	2	5	14	14	13	20	10	20	0	0	28	29	0	0
2214	HigherMuhr	15	15	18	8	4	4	35	8	22	38	0	0	11	8	15	4	12	12	11	8	5	5	8	8	14	4	11	9	16	4	15	15	13	21	2	5	14	6	13	13	20	20	13	21	28	28	9	9
2215	HigherMuhr	15	36	7	7	0	0	0	0	45	5	0	0	11	8	15	15	12	12	1	11	5	5	12	33	10	10	9	9	14	14	15	15	21	21	5	5	14	14	13	13	13	22	0	0	29	30	34	5
2216	HigherMuhr	30	49	10	18	4	4	35	8	0	0	0	0	11	11	15	15	12	12	1	3	5	5	12	33	14	17	11	9	14	27	15	15	10	16	5	5	14	14	13	13	20	20	0	0	23	28	28	28
2217	HigherMuhr	0	0	18	7	0	0	0	0	11	44	0	0	11	11	15	15	12	12	1	11	5	5	12	12	14	18	11	9	14	8	15	15	21	24	2	5	14	14	13	13	20	20	21	7	28	28	21	9
2218	HigherMuhr	23	59	18	18	3	4	33	7	22	4	51	8	11	11	13	15	12	12	1	6	5	5	12	4	14	14	9	9	15	4	15	15	21	25	5	5	14	14	13	13	20	20	13	13	24	28	28	28
2219	HigherMuhr	14	43	13	7	4	4	33	35	22	29	43	65	11	8	15	8	12	12	14	16	5	5	12	12	14	8	9	9	12	4	15	15	21	25	5	5	14	14	17	7	20	20	0	0	25	28	34	34
2220	HigherMuhr	14	59	18	7	3	4	35	7	0	0	51	67	11	8	15	15	12	12	14	8	5	5	12	12	14	14	11	9	0	0	15	15	16	16	5	5	14	14	13	13	20	20	13	15	28	28	28	9
2221	HigherMuhr	14	23	13	7	4	4	26	35	21	28	51	53	11	11	15	4	12	3	11	2	5	5	15	22	14	4	9	9	14	14	15	15	16	25	5	5	14	14	13	13	2	20	15	21	23	28	34	38
2222	HigherMuhr	25	59	10	7	4	4	33	33	28	29	51	65	8	8	12	15	12	9	11	3	5	5	12	12	14	14	9	9	4	9	15	15	10	21	2	5	14	14	13	13	20	6	13	21	25	28	28	9
2223	HigherMuhr	39	5	18	7	0	0	0	0	0	0	28	65	11	11	13	15	12	9	1	11	5	5	12	8	14	4	9	9	14	24	14	15	16	16	2	5	14	8	13	13	10	20	20	20	29	30	28	34
2224	HigherMuhr	15	71	18	7	0	0	0	0	21	22	0	0	11	8	15	15	12	9	1	17	5	5	12	19	14	14	11	9	14	27	15	15	21	4	5	5	14	17	13	13	2	20	13	13	28	28	28	28
2197	LowerMuhr	79	79	18	18	4	4	0	0	22	29	51	81	11	11	15	15	12	12	11	7	5	5	12	2	14	14	9	9	15	4	15	7	21	25	5	5	14	14	13	13	2	20	21	21	28	30	9	9
2198	LowerMuhr	23	71	18	18	0	0	0	0	44	45	0	0	11	8	15	15	12	12	11	11	5	5	12	5	14	14	3	9	14	14	15	6	16	3	5	5	14	14	13	13	20	20	23	7	28	28	28	52
2199	LowerMuhr	59	71	10	13	0	0	7	8	0	0	0	0	11	7	15	6	12	14	11	14	5	5	12	12	14	14	3	9	14	4	15	15	16	27	5	5	14	14	13	13	20	20	21	21	28	28	28	34
2200	LowerMuhr	15	36	13	7	3	4	0	0	0	0	51	65	11	11	13	15	12	12	11	11	5	5	12	12	14	14	9	9	14	4	15	15	24	27	5	5	14	14	13	13	2	20	13	21	28	28	21	34
2201	LowerMuhr	71	71	7	7	0	0	25	8	0	0	0	0	11	8	13	15	12	14	17	2	5	5	12	25	14	18	11	9	14	4	15	15	16	24	2	5	14	14	13	16	16	20	21	21	28	28	21	34
2202	LowerMuhr	23	71	7	7	0	0	6	8	4	4	4	51	11	8	13	15	12	12	11	11	5	5	29	29	14	14	8	9	14	24	15	15	10	21	5	5	14	8	13	13	20	20	15	15	28	29	28	34
2203	LowerMuhr	79	79	18	18	4	4	35	8	0	0	51	6	11	11	13	15	12	12	14	17	5	5	12	33	13	13	9	9	0	0	15	18	16	21	5	5	14	14	13	13	20	20	20	21	28	28	28	34
2204	LowerMuhr	30	71	7	7	0	0	6	8	0	0	0	0	11	11	13	15	12	12	11	11	5	5	12	24	14	17	8	9	14	16	15	8	11	21	5	5	14	14	13	13	2	20	13	21	23	28	28	50
2205	LowerMuhr	23	71	18	7	0	0	8	8	3	4	0	0	11	11	15	15	12	9	11	11	5	5	12	29	14	14	11	11	15	20	15	15	21	24	5	5	14	14	13	13	20	20	13	13	28	29	34	50
2206	LowerMuhr	15	36	13	7	4	4	15	25	29	45	50	65	11	11	13	15	12	12	11	11	5	5	12	12	14	14	9	9	14	4	15	15	24	27	5	5	14	14	13	13	2	20	13	21	28	28	21	34
2207	LowerMuhr	49	79	7	7	3	4	35	8	22	28	28	64	11	11	15	15	12	12	11	17	5	5	12	8	14	14	11	9	26	27	15	15	16	24	5	5	14	17	13	7	20	20	21	21	25	28	0	0
2208	LowerMuhr	26	79	7	7	3	4	35	8	0	0	0	0	11	11	13	15	12	12	11	17	5	5	12	8	14	24	11	9	26	27	15	15	16	24	5	5	14	17	13	7	20	20	0	0	25	28	3	9
2209	LowerMuhr	5	5	18	6	4	4	25	35	0	0	0	0	11	8	13	15	12	12	11	8	5	5	12	12	14	17	9	9	14	14	15	15	21	24	5	5	14	14	13	13	20	20	0	0	25	28	21	28
2770	Rothwald	15	30	18	7	0	0	0	0	0	0	51	74	8	8	13	15	0	0	11	8	5	5	12	25	14	15	8	8	16	16	15	15	16	24	5	5	14	6	13	13	20	41	13	13	28	28	16	34
2771	Rothwald	52	52	18	7	0	0	0	0	0	0	51	70	11	8	13	15	0	0	11	14	0	0	12	12	14	26	11	3	14	14	15	6	16	24	5	5	14	2	13	13	20	22	0	0	28	28	28	28
2792	Rothwald	14	23	0	0	0	0	0	0	0	0	0	0	8	8	13	13	12	12	11	11	0	0	19	4	0	0	0	0	14	14	0	0	21	25	5	5	0	0	13	13	20	20	0	0	0	0	28	28
2793	Rothwald	36	96	0	0	0	0	0	0	0	0	0	0	8	8	13	15	0	0	11	11	0	0	12	8	0	0	0	0	4	4	0	0	11	21	0	0	0	0	0	0	12	16	0	0	0	0	34	34
2796	Rothwald	36	79	13	7	0	0	0	0	0	0	28	73	8	8	15	6	12	12	11	3	5	5	12	33	14	14	9	9	14	4	15	15	21	24	5	5	14	14	13	24	20	20	0	0	28	28	28	34
2798	Rothwald	0	0	0	0	0	0	0	0	0	0	0	0	11	11	15	15	0	0	11	11	0	0	0	0	0	0	0	0	0	0	0	0	0	0	0	0	0	0	0	0	20	37	0	0	0	0	38	38
2799	Rothwald	23	30	18	7	0	0	0	0	0	0	0	0	11	8	13	15	0	0	11	14	0	0	12	25	0	0	0	0	0	0	0	0	21	24	5	5	14	14	13	13	12	20	0	0	0	0	0	0
2803	Rothwald	36	5	18	7	0	0	0	0	0	0	70	81	11	11	15	15	0	0	11	8	5	5	12	4	14	14	9	9	26	4	15	15	11	24	5	5	14	14	16	25	20	20	13	15	28	30	28	34
2815	Rothwald	23	71	18	18	0	0	0	0	0	0	0	0	11	11	15	15	12	12	11	6	5	5	12	12	14	18	11	3	12	4	15	15	16	21	5	5	14	14	13	13	16	20	13	13	23	28	28	54
2817	Rothwald	35	36	18	21	0	0	0	0	0	0	0	0	11	11	15	5	0	0	11	11	0	0	0	0	13	14	11	11	0	0	15	15	16	21	0	0	14	14	0	0	0	0	0	0	25	28	11	34
2823	Rothwald	15	36	7	7	0	0	0	0	0	0	0	0	11	11	19	6	0	0	1	8	0	0	25	8	0	0	0	0	14	14	0	0	21	21	5	5	14	14	13	24	2	20	0	0	0	0	46	48
2824	Rothwald	15	15	18	7	0	0	0	0	0	0	51	81	11	11	15	15	0	0	11	15	5	5	12	17	14	14	9	9	14	16	15	15	21	4	3	5	14	14	13	13	20	20	13	15	28	28	17	34
2825	Rothwald	36	79	13	7	0	0	0	0	0	0	65	70	11	8	13	15	12	12	11	16	0	0	12	25	14	14	11	2	4	4	15	15	21	35	5	5	14	14	13	24	20	20	0	0	0	0	0	0
2826	Rothwald	30	71	13	13	0	0	0	0	0	0	0	0	11	11	13	15	12	12	1	11	5	5	12	12	14	14	9	9	16	24	15	15	25	4	5	5	14	8	13	13	12	20	0	0	28	28	28	28
2857	Rothwald	71	71	7	7	0	0	0	0	0	0	51	99	11	11	13	15	0	0	11	6	0	0	12	25	14	8	9	9	14	14	15	15	21	21	2	5	14	14	13	13	20	20	0	0	25	28	21	55
2858	Rothwald	30	5	10	7	0	0	0	0	0	0	101	82	11	11	12	15	12	12	1	17	5	5	25	25	17	18	11	9	14	8	15	15	21	4	5	5	14	14	13	22	20	22	0	0	28	7	16	28
2866	Rothwald	23	58	13	7	0	0	0	0	0	0	0	0	11	11	15	15	9	9	11	9	5	5	12	12	14	14	11	9	14	14	15	15	21	4	5	5	14	14	13	13	2	20	13	13	28	28	46	9
2867	Rothwald	36	5	18	7	0	0	0	0	0	0	0	0	11	11	15	15	0	0	11	11	0	0	12	33	0	0	9	9	0	0	15	15	21	25	5	5	0	0	1	13	2	20	0	0	28	52	28	28
2868	Rothwald	0	0	13	13	0	0	0	0	0	0	0	0	8	8	13	13	12	12	17	17	0	0	12	25	0	0	0	0	0	0	0	0	21	21	0	0	0	0	0	0	20	20	0	0	0	0	0	0
2870	Rothwald	23	23	18	7	0	0	25	7	0	0	28	96	11	8	13	15	0	0	16	17	5	5	12	8	14	14	11	9	14	14	15	15	13	21	5	5	14	14	10	13	20	20	13	13	28	50	34	34
2871	Rothwald	15	23	5	7	0	0	0	0	0	0	71	88	11	11	15	15	0	0	13	8	5	5	12	4	13	14	9	9	16	23	15	15	16	21	5	5	14	14	13	13	20	20	13	13	23	25	28	28
2872	Rothwald	5	71	11	7	0	0	0	0	0	0	0	0	8	8	13	15	0	0	11	3	5	5	4	8	14	17	9	9	27	7	15	3	21	25	5	5	14	4	13	13	20	20	0	0	25	28	34	9
2879	Rothwald	23	58	18	7	0	0	0	0	0	0	63	77	11	8	15	5	0	0	11	3	5	5	15	25	14	14	11	9	14	16	15	15	10	21	5	5	14	14	13	13	2	20	13	15	25	28	11	9
2880	Rothwald	71	79	18	7	0	0	24	25	0	0	71	84	11	11	15	15	0	0	11	11	5	5	12	25	14	17	11	9	23	24	15	15	21	21	5	5	14	8	13	13	20	20	13	13	28	45	53	9
2908	Rothwald	15	58	18	7	0	0	0	0	0	0	0	0	11	11	15	15	0	0	11	14	5	5	12	13	14	8	9	9	23	4	15	15	11	21	5	5	14	14	13	16	20	20	21	7	28	31	28	34
2909	Rothwald	36	79	18	18	0	0	0	0	0	0	67	96	11	11	13	15	12	12	1	3	5	5	33	36	10	8	9	9	14	14	15	15	21	24	5	5	14	14	13	13	20	20	0	0	28	29	28	34
2911	Rothwald	15	23	10	13	0	0	0	0	0	0	74	81	11	8	13	3	0	0	1	11	5	5	0	0	14	8	11	9	0	0	15	15	16	21	0	0	14	14	0	0	0	0	0	0	25	25	48	48
2927	Rothwald	23	30	13	7	0	0	0	0	0	0	0	0	11	8	0	0	0	0	11	11	0	0	0	0	0	0	0	0	0	0	0	0	16	16	0	0	0	0	0	0	0	0	0	0	28	28	19	3
1834	Flurwald,Vorarlberg	15	71	13	18	0	0	7	8	0	0	0	0	11	11	13	15	12	12	11	14	5	5	12	6	14	14	9	9	16	4	15	15	21	25	2	5	14	14	13	13	19	20	21	21	28	29	35	9
1835	Flurwald,Vorarlberg	0	0	18	7	3	4	33	39	29	29	51	65	11	11	15	4	12	12	11	11	5	5	20	25	18	26	9	9	16	4	15	15	25	30	5	5	14	14	13	13	20	20	15	21	28	28	28	28
1836	Flurwald,Vorarlberg	15	30	7	7	0	0	0	0	0	0	51	65	11	8	15	15	12	12	11	16	5	5	12	12	14	14	9	9	16	16	15	15	16	25	5	5	14	14	13	13	19	20	15	21	28	7	28	36
1837	Flurwald,Vorarlberg	23	71	18	7	0	0	32	32	0	0	51	73	11	11	15	15	12	12	3	6	5	5	12	12	14	26	9	9	14	4	15	15	21	4	5	5	14	14	13	13	2	20	13	21	28	28	28	34
1838	Flurwald,Vorarlberg	11	11	18	18	4	4	37	7	0	0	0	0	11	11	15	15	12	12	11	16	5	5	12	12	14	26	9	9	16	17	15	15	16	25	5	5	14	3	13	13	20	20	21	21	30	31	28	34
1839	Flurwald,Vorarlberg	23	30	13	13	0	0	5	6	0	0	19	28	11	11	15	15	12	12	11	11	5	5	12	5	13	13	6	8	27	27	15	15	16	25	5	5	14	14	13	13	2	20	15	15	28	28	34	34
1840	Flurwald,Vorarlberg	0	0	7	7	0	0	0	0	11	45	0	0	11	11	15	15	12	12	15	6	5	5	12	8	14	14	9	9	16	27	15	6	16	24	5	5	14	6	13	13	19	20	13	13	28	29	12	9
1842	Flurwald,Vorarlberg	23	31	18	18	3	3	33	33	0	0	51	55	11	8	15	15	12	12	11	3	5	5	12	8	14	19	3	9	14	4	15	15	16	24	5	5	14	14	13	13	12	20	13	21	23	28	34	9
1843	Flurwald,Vorarlberg	23	90	18	18	0	0	7	8	0	0	0	0	11	11	15	15	12	3	16	16	5	5	12	4	26	4	9	9	12	17	15	15	16	19	5	5	14	3	13	20	20	20	21	21	28	31	28	34
1846	Silbertal,Vorarlberg	0	0	0	0	0	0	0	0	0	0	0	0	11	8	15	5	12	3	11	6	0	0	12	12	0	0	9	9	14	14	15	15	21	21	5	5	14	14	10	13	20	20	0	0	0	0	0	0
1847	Silbertal,Vorarlberg	23	38	18	18	0	0	11	32	0	0	37	51	11	11	13	19	12	12	11	11	5	5	12	5	14	26	9	9	16	4	15	7	16	21	5	5	14	14	13	13	20	20	13	21	28	28	28	9
1848	Silbertal,Vorarlberg	23	59	18	5	0	0	7	8	0	0	43	53	11	11	4	8	12	12	11	15	5	5	25	25	13	14	11	6	14	14	15	15	27	4	5	5	14	20	13	13	20	20	13	21	28	28	28	28
1849	Silbertal,Vorarlberg	23	23	18	7	4	4	33	35	28	29	0	0	11	8	15	15	12	9	11	11	5	5	12	33	13	14	8	9	12	14	15	15	16	25	5	5	14	14	13	13	12	20	11	21	16	28	28	28
1850	Silbertal,Vorarlberg	0	0	18	18	1	2	15	8	22	29	28	53	11	8	15	15	12	12	11	11	5	5	25	28	14	26	8	9	27	4	15	15	16	21	5	5	14	17	13	20	20	20	13	13	28	31	28	48
1851	Silbertal,Vorarlberg	59	67	18	7	0	0	31	32	0	0	51	51	11	11	15	15	12	12	11	11	5	5	12	12	14	14	6	9	4	4	14	15	21	24	5	5	14	14	13	13	20	20	15	7	28	28	28	34
1852	Silbertal,Vorarlberg	23	90	18	7	3	4	33	35	21	29	19	19	11	8	13	13	12	9	11	14	5	5	12	33	13	14	9	9	14	14	15	15	19	21	5	5	14	20	13	13	20	20	13	13	28	28	34	9
1853	Silbertal,Vorarlberg	23	23	18	18	0	0	0	0	0	0	0	0	11	15	15	15	12	9	11	8	5	5	12	12	14	14	8	9	12	16	15	15	11	21	5	5	14	14	13	13	20	20	13	13	28	28	28	28
1855	Silbertal,Vorarlberg	23	71	13	13	3	4	8	8	0	0	28	51	11	8	14	15	12	14	11	6	5	5	12	25	26	4	9	9	16	24	15	15	16	21	5	5	14	8	13	16	20	20	15	7	25	28	5	5
[truncated: 36 more columns]

## Sheet: EST
samples		SPRU45_AGG	SPRU45_AGG	SPRU46_CAG	SPRU46_CAG	SPRU54dup2_CAG	SPRU54dup2_CAG	SPRU55_CAG	SPRU55_CAG	SPRU58_CAC	SPRU58_CAC	SPRU62_AGC	SPRU62_AGC	SPRU66_TGC	SPRU66_TGC	SPRU67_TCA	SPRU67_TCA	SPRU75_GA	SPRU75_GA	SPRU77_GA	SPRU77_GA	SPRU79_GAA	SPRU79_GAA	SPRU81_CTG	SPRU81_CTG	SPRU82_TCC	SPRU82_TCC	SPRU83_TCC	SPRU83_TCC	SPRU84_GT	SPRU84_GT	SPRU92_AGAA	SPRU92_AGAA
2210	HigherMuhr	11	14	12	17	7	7	0	0	0	0	21	25	10	10	11	11	12	23	0	0	11	25	0	0	0	0	42	43	3	3	10	10
2211	HigherMuhr	11	11	3	3	7	7	0	0	0	0	25	29	10	10	0	0	10	10	35	35	11	4	11	11	0	0	22	36	0	0	10	7
2212	HigherMuhr	11	11	12	12	7	7	0	0	0	0	21	25	10	10	0	0	10	26	0	0	11	11	0	0	0	0	22	36	16	16	10	10
2213	HigherMuhr	11	11	12	12	7	7	2	2	0	0	25	25	10	10	0	0	0	0	33	5	11	5	0	0	0	0	57	61	0	0	10	10
2214	HigherMuhr	11	11	12	17	7	7	0	0	0	0	19	25	10	10	0	0	0	0	15	15	11	17	11	11	0	0	22	54	0	0	10	10
2215	HigherMuhr	11	11	12	12	7	7	0	0	0	0	21	25	10	10	0	0	6	6	33	34	11	11	0	0	0	0	8	8	16	16	10	10
2216	HigherMuhr	11	11	17	3	7	7	0	0	0	0	21	25	10	5	0	0	0	0	33	33	11	6	11	14	0	0	16	43	0	0	10	10
2217	HigherMuhr	11	11	12	12	12	7	0	0	0	0	21	25	10	10	11	11	12	12	33	33	11	11	0	0	0	0	0	0	0	0	10	10
2218	HigherMuhr	11	11	12	12	7	7	0	0	0	0	21	25	10	10	11	14	23	23	0	0	11	17	0	0	15	29	7	8	9	9	10	10
2219	HigherMuhr	0	0	12	3	12	7	0	0	0	0	21	25	10	10	0	0	28	28	33	33	11	6	0	0	0	0	0	0	0	0	10	10
2220	HigherMuhr	11	11	12	3	7	7	0	0	0	0	29	32	10	13	0	0	12	12	33	33	11	6	0	0	0	0	3	8	0	0	10	7
2221	HigherMuhr	0	0	12	17	7	7	0	0	16	22	21	21	10	10	14	14	23	9	0	0	11	11	0	0	39	65	45	8	3	3	10	10
2222	HigherMuhr	0	0	12	12	3	3	2	2	30	30	21	25	10	10	0	0	12	28	0	0	11	25	0	0	0	0	8	8	5	6	10	4
2223	HigherMuhr	11	11	12	3	7	7	0	0	0	0	23	25	10	14	0	0	0	0	0	0	25	6	0	0	0	0	54	60	0	0	10	10
2224	HigherMuhr	11	11	12	12	7	7	0	0	0	0	21	25	10	10	0	0	12	26	0	0	11	25	0	0	0	0	0	0	0	0	10	7
2197	LowerMuhr	0	0	12	3	7	8	0	0	0	0	25	29	10	10	0	0	23	23	0	0	0	0	0	0	0	0	36	8	0	0	10	10
2198	LowerMuhr	11	11	12	17	7	7	0	0	22	22	21	25	10	10	11	11	28	28	15	15	11	11	0	0	2	29	0	0	0	0	10	10
2199	LowerMuhr	0	0	12	12	7	7	0	0	22	8	25	34	10	10	0	0	12	23	35	35	11	11	0	0	0	0	22	46	14	3	10	10
2200	LowerMuhr	11	11	12	12	3	3	2	2	7	7	21	25	10	19	0	0	0	0	0	0	17	4	0	0	0	0	0	0	0	0	10	10
2201	LowerMuhr	11	11	12	12	7	7	0	0	0	0	21	35	10	10	0	0	6	9	27	28	11	13	0	0	0	0	54	54	0	0	10	7
2202	LowerMuhr	11	11	12	12	7	7	2	2	22	22	25	30	10	10	0	0	12	12	33	33	0	0	0	0	0	0	8	8	16	16	10	10
2203	LowerMuhr	18	18	13	3	7	7	2	2	22	22	21	21	10	10	0	0	4	4	33	33	11	6	11	14	0	0	0	0	3	7	10	10
2204	LowerMuhr	0	0	12	3	3	7	0	0	10	34	21	25	10	10	0	0	0	0	0	0	11	5	0	0	0	0	22	36	3	7	10	10
2205	LowerMuhr	11	11	12	12	7	7	0	0	0	0	25	26	10	10	0	0	0	0	0	0	0	0	0	0	0	0	0	0	0	0	10	7
2206	LowerMuhr	11	11	12	12	3	3	2	2	0	0	21	25	10	19	0	0	0	0	27	30	4	4	0	0	0	0	0	0	3	3	10	10
2207	LowerMuhr	0	0	12	18	12	7	0	0	0	0	21	25	10	10	11	14	12	28	35	35	11	6	0	0	0	0	0	0	16	16	10	10
2208	LowerMuhr	0	0	12	18	12	7	0	0	22	22	21	25	10	10	0	0	12	28	35	35	11	6	11	14	0	0	36	54	16	16	10	10
2209	LowerMuhr	0	0	12	12	7	7	0	0	0	0	21	32	10	10	0	0	0	0	9	9	0	0	0	0	0	0	0	0	0	0	10	10
2770	Rothwald	0	0	17	17	3	7	6	9	2	34	21	29	10	10	14	14	23	26	19	26	11	8	0	0	0	0	6	80	11	3	10	10
2771	Rothwald	0	0	0	0	7	7	6	6	0	0	21	30	10	10	0	0	26	26	9	9	0	0	0	0	0	0	0	0	3	8	10	3
2792	Rothwald	0	0	0	0	0	0	0	0	22	34	25	5	10	10	0	0	0	0	33	35	0	0	0	0	0	0	0	0	0	0	10	10
2793	Rothwald	0	0	0	0	0	0	0	0	22	23	21	25	10	4	0	0	0	0	27	33	0	0	0	0	0	0	0	0	0	0	10	10
2796	Rothwald	11	11	12	12	7	7	12	6	2	22	21	25	10	10	11	14	6	9	15	19	21	21	0	0	0	0	0	0	3	5	10	6
2798	Rothwald	0	0	0	0	7	7	0	0	0	0	25	31	10	10	0	0	0	0	15	15	0	0	0	0	0	0	0	0	0	0	10	10
2799	Rothwald	0	0	0	0	7	7	0	0	22	29	25	25	10	10	0	0	0	0	24	40	0	0	0	0	0	0	0	0	0	0	0	0
2803	Rothwald	0	0	12	12	7	7	12	6	22	23	21	25	10	10	1	14	23	6	35	35	11	6	14	14	0	0	0	0	11	11	10	10
2815	Rothwald	32	32	12	12	7	7	6	6	22	22	30	30	10	10	11	11	23	9	19	36	0	0	2	3	0	0	0	0	1	3	10	10
2817	Rothwald	11	11	12	12	7	7	0	0	0	0	30	38	10	10	0	0	0	0	15	15	0	0	0	0	0	0	0	0	16	5	10	10
2823	Rothwald	0	0	0	0	0	0	0	0	0	0	21	25	10	10	0	0	0	0	19	35	0	0	0	0	0	0	0	0	3	5	10	10
2824	Rothwald	24	24	12	12	7	7	2	6	34	34	21	25	10	10	0	0	12	28	9	9	11	6	0	0	39	95	0	0	16	25	10	10
2825	Rothwald	11	11	12	17	0	0	0	0	34	34	21	29	10	10	0	0	0	0	35	35	0	0	0	0	0	0	0	0	0	0	10	10
2826	Rothwald	35	35	12	12	3	7	6	6	6	6	21	25	10	10	14	14	23	28	27	49	11	6	0	0	0	0	0	0	3	3	20	3
2857	Rothwald	0	0	12	17	7	7	0	0	22	34	19	4	10	10	11	11	0	0	27	51	0	0	0	0	0	0	0	0	3	5	10	10
2858	Rothwald	11	11	12	12	7	7	11	6	31	34	32	6	10	4	11	11	29	29	24	33	11	6	0	0	0	0	57	57	23	3	10	19
2866	Rothwald	27	36	12	12	7	7	2	6	22	9	21	25	10	4	1	11	28	28	33	60	12	18	11	11	0	0	57	8	3	3	10	11
2867	Rothwald	0	0	0	0	0	0	0	0	0	0	25	25	10	10	0	0	0	0	47	65	0	0	0	0	0	0	0	0	0	0	10	8
2868	Rothwald	0	0	0	0	0	0	0	0	0	0	0	0	0	0	0	0	0	0	0	0	0	0	0	0	0	0	0	0	0	0	10	10
2870	Rothwald	11	11	12	12	7	7	6	6	0	0	21	25	10	10	1	11	23	4	15	26	24	25	11	14	0	0	0	0	3	5	10	3
2871	Rothwald	11	24	12	7	3	7	2	6	14	35	21	25	10	10	11	11	12	6	33	33	0	0	0	0	0	0	54	73	3	3	10	10
2872	Rothwald	11	24	12	12	7	7	0	0	22	8	21	30	10	10	11	11	0	0	33	59	11	6	0	0	0	0	0	0	3	5	10	10
2879	Rothwald	24	24	12	12	7	7	6	6	14	22	21	25	10	4	11	14	12	9	40	8	11	6	14	14	0	0	0	0	3	5	10	4
2880	Rothwald	11	11	12	12	7	7	1	6	34	9	21	3	10	10	1	14	20	23	9	9	11	6	8	9	25	95	52	57	16	3	10	10
2908	Rothwald	0	0	12	17	7	7	6	6	22	22	21	21	10	10	11	11	23	23	33	33	11	6	14	9	0	0	16	43	11	3	10	10
2909	Rothwald	11	11	12	12	3	7	13	20	1	22	21	25	10	10	11	11	23	28	33	33	5	5	0	0	0	0	3	3	3	3	10	10
2911	Rothwald	11	25	12	17	7	7	6	6	14	34	21	25	10	10	1	11	6	9	19	19	5	5	11	2	0	0	8	8	3	5	10	10
2927	Rothwald	11	11	0	0	0	0	0	0	0	0	0	0	0	0	0	0	0	0	0	0	0	0	0	0	0	0	0	0	0	0	0	0
1834	Flurwald,Vorarlberg	0	0	10	12	3	7	0	0	22	22	21	25	10	10	1	11	23	28	33	33	0	0	6	6	13	73	22	36	0	0	1	10
1835	Flurwald,Vorarlberg	0	0	12	12	3	7	0	0	15	22	21	25	10	10	1	11	26	28	0	0	11	11	11	3	27	71	0	0	0	0	10	10
1836	Flurwald,Vorarlberg	7	7	12	12	3	7	0	0	16	16	25	35	10	10	1	14	12	28	35	35	11	11	11	11	0	0	22	36	0	0	10	10
1837	Flurwald,Vorarlberg	0	0	12	12	7	7	0	0	19	22	21	25	10	10	1	11	6	6	35	35	0	0	10	2	18	57	8	8	0	0	10	10
1838	Flurwald,Vorarlberg	0	0	0	0	7	7	0	0	0	0	25	25	10	10	0	0	0	0	33	33	11	6	0	0	2	2	0	0	0	0	10	10
1839	Flurwald,Vorarlberg	11	11	12	17	3	3	2	2	22	22	21	25	10	10	11	11	23	23	0	0	11	17	0	0	0	0	52	8	2	5	10	10
1840	Flurwald,Vorarlberg	11	11	12	17	12	7	0	0	16	16	21	21	10	10	11	11	12	28	0	0	11	13	11	8	0	0	22	33	0	0	10	10
1842	Flurwald,Vorarlberg	11	11	12	12	7	7	0	0	16	22	25	32	10	10	11	14	10	9	33	33	11	11	14	14	0	0	8	8	0	0	10	10
1843	Flurwald,Vorarlberg	0	0	12	12	3	7	0	0	18	18	21	25	10	10	11	11	12	12	33	5	10	11	11	14	15	18	22	36	0	0	10	10
1846	Silbertal,Vorarlberg	11	11	12	12	7	7	0	0	22	22	21	25	10	10	11	11	28	6	0	0	11	17	11	9	0	0	0	0	3	3	10	7
1847	Silbertal,Vorarlberg	11	11	12	17	3	7	2	2	22	22	21	21	10	10	14	14	12	12	0	0	11	6	0	0	0	0	22	33	9	9	10	10
1848	Silbertal,Vorarlberg	11	11	12	12	7	7	2	2	31	31	25	25	10	10	11	11	12	28	0	0	0	0	0	0	0	0	67	8	0	0	10	10
1849	Silbertal,Vorarlberg	0	0	12	12	3	7	0	0	22	22	21	25	10	10	11	11	12	26	32	32	13	21	6	8	21	26	46	46	0	0	10	10
1850	Silbertal,Vorarlberg	11	11	12	12	12	7	2	2	22	9	21	25	10	10	11	11	28	28	0	0	11	11	0	0	0	0	16	8	0	0	10	10
1851	Silbertal,Vorarlberg	0	0	12	12	7	7	0	0	16	22	21	25	10	10	1	11	0	0	0	0	11	17	11	11	0	0	22	33	3	5	10	10
1852	Silbertal,Vorarlberg	11	11	12	12	3	3	0	0	22	34	21	35	10	10	0	0	12	12	0	0	11	5	6	6	0	0	16	43	0	0	6	7
1853	Silbertal,Vorarlberg	11	11	12	17	3	3	2	2	22	34	25	25	10	10	11	11	22	26	35	35	11	6	9	9	55	58	3	3	1	1	10	10
1855	Silbertal,Vorarlberg	11	11	12	12	3	7	0	0	22	22	21	25	10	10	1	11	28	28	16	33	11	6	11	2	13	39	36	8	0	0	10	10
