# Supplementary material for: A GBAS marker system for assessing genetic diversity and population differentiation in Norway Spruce
Source: Research Square preprint supplement (doi:10.21203/rs.3.rs-7722464/v1), 2025-10-17
Supplement: Supplementary file 2 [file 6f9746af501058fd8b1deeb1.docx]

# Supplementary material of ‘A GBAS marker system for assessing genetic diversity and population differentiation in Norway Spruce’

Thapasya Vijayan1, Christina Rupprecht1, Manuel Curto2,3, Bernhard Splechtna1, Sebastian Sonnenberg1, Harald Meimberg1

1BOKU University; Department of Ecosystem Management, Climate and Biodiversity; Institute for Integrative Nature Conservation Research; Vienna, Austria

2Associação BIOPOLIS - Rede de Investigação em Biodiversidade e Biologia Evolutiva, Campus Agrário de Vairão, 4485-661 Vairão, Portugal

3CIBIO, Centro de Investigação em Biodiversidade e Recursos Genéticos, InBIO Laboratório Associado,Universidade do Porto, Campus de Vairão, Rua Padre Armando Quintas, no. 7, 4485-661 Vairão, Portugal

*Corresponding author

### DNA isolation protocol

The needles were silica dried and then pulverized in 2 ml tubes in a Collomix shaker v.2.07r (Collomix GmbH, Gaimersheim, Germany), at a maximum force for 15 min using Typ 2Y-P 2.6 – 3.3mm ‘Premium’ Zirconium Oxide / Yttrium stabilized ceramic beads from SiLibeads for DNA extraction. For lysis, we incubated each sample with 400 µl of lysis buffer (containing 2% SDS, 2% PVP40, 250 mM NaCl, 200 mM Tris-HCl, 5mM EDTA at pH 8) and 13 µl of Proteinase K (10 mg/ml) at 56°C with shaking at 350rpm overnight. For protein precipitation, 100 µl of chilled 3 M KOAc was added, incubated on ice for 20 minutes, and subjected to differential centrifugation – first at 1000 rpm for 1 minute, followed by 12,000 rpm for 8 minutes. The resulting supernatant was mixed with 1.5 volumes of binding buffer (2M Guanidine hydrochloride in 95% Ethanol) and passed through a silica membrane column (Econospin TM, Epoch Life Science, Inc, USA) by centrifugation at 14,000 rpm for 1 minute. The membrane was then washed twice with 500 µl of 70% ethanol, and the DNA was eluted with 50 µl of 10 mM Tris buffer (pH 7.5). The eluted DNA was subsequently visualized on an agarose gel for quality assessment.

| **Reference** | ([Ranade et al. 2015](#_ENREF_3)) | ([Ranade et al. 2015](#_ENREF_3)) | ([Morgante et al. 1996](#_ENREF_1)) | ([Ranade et al. 2015](#_ENREF_3)) | ([Rajora and Mann 2021](#_ENREF_2)) | | ([Rajora and Mann 2021](#_ENREF_2)) | | [Scotti et al. 2000](#_ENREF_42)) | | [Ranade et al. 2015](#_ENREF_38)) | | ([Scotti et al. 2000](#_ENREF_5)) | | ([Ranade et al. 2015](#_ENREF_3)) | | ([Ranade et al. 2015](#_ENREF_3)) | | ([Ranade et al. 2015](#_ENREF_3)) | | [Ranade et al. 2015](#_ENREF_38)) | | | [Ranade et al. 2015](#_ENREF_38)) | | ([Ranade et al. 2015](#_ENREF_3)) |
| --- | --- | --- | --- | --- | --- | --- | --- | --- | --- | --- | --- | --- | --- | --- | --- | --- | --- | --- | --- | --- | --- | --- | --- | --- | --- | --- |
| **PIC/ PIC+** | 0/0.53 | 0/0.77 | 0.49/0.70 | 0.03/0.35 | 0.78/0.91 | | 0.34/0.62 | | 0.79/0.84 | | 0/0-068 | | 0.63/0.65 | | 0/0.13 | | 0.35/0.68 | | 0.21/0.53 | | 0/0.27 | | | 0.0.066 | | 0.08/0.74 |
| **He/ He+** | 0/0.68 | 0/0.82 | 0.53/0.74 | 0.03/0.42 | 0.93/0.78 | | 0.49/0.7 | | 0.85/0.89 | | 0/0.07 | | 0.71/0.67 | | 0/0.13 | | 0.4/0.7 | | 0.23/0.58 | | 0.05/0.28 | | | 0/0.07 | | 0.09/0.76 |
| **Ho/  Ho+** | 0/0.85 | 0/0.68 | 0.4/.61 | 0.03/0.25 | 0.65/0.8 | | 0.64/0.44 | | 0.36/0.27 | | 0/0.04 | | 0.64/0.71 | | 0/0.14 | | 0.45/0.79 | | 0.19/0.36 | | 0/0.24 | | | 0/0.07 | | 0.09/0.44 |
| **Na/ Na+** | 1/19 | 1/12 | 5/11 | 3/13 | 10/18 | | 3/11 | | 1/16 | | 1/8 | | 9/15 | | 1/12 | | 3/14 | | 3/8 | | 1/5 | | | 1/9 | | 2/12 |
| **Allele  size** | 483 | 475-478 | 476-526 | 454-487 | 460-488 | | 468-470 | | 488-516 | | 495 | | 464-508 | | 447-450 | | 464-476 | | 472-490 | | 461 | | | 485 | | 476-479 |
| **Motif** S1. Summary of EST markers and their characteristics | (AGC)4 | (TCA)4 | (TC)5TT(TC)10 | (CAG)7 | (GA)11 | | (GAA)6 | | (CT-TG)23 | | (AG)6 | | (GT)14 | | (TGC)4 | | (CAG)8 | | (AGG)8 | | (AGAA)3 | | | (GA)6 | | (CAC)7 |
| **Primer mix** | 1 | 1 | 1 | 1 | 1 | | 1 | | 1 | | 1 | | 2 | | 2 | | 2 | | 2 | | 2 | | | 2 | | 3 |
| **Forward Reverse** | AACAACATACCGAGATCGAC CAAAGGCGAAGAATTGGATC | GATCCATGGAAGAAGACTCG AGTAGAGAAGAGCACGAAAC | ACAGTTGTAACTTGCCAGTA TCTACCACAAGCAACAATCA | GATGAGAGAGCGAGTTGATT ATGAGGTGTGGAGGGATATT | GAAAGCCTGAGATGTTCTGA TTCTGTTTTGAACTTGGTGC | | CCCTCCCATTCCATTTCATT GCAAAATACATACATCGGCC | | CACCTTGCAACTGTGAATTT TGAAACCCTTGGATTTGGAA | | ATTTCCTAGGAAGAGGCTCT TCCCTCTTTCCCTGATAGTT | | AAAACTTCTGCTACTACGGG AACACCAACCTGATTCATCA | | CTAACATTAGACGCCCATCA GCTCTTCCAAGACTACAGAG | | TGAAGCGTGGATTATTGTCT TCTCGAGAGGCTCTATATCG | | TTCTTCTCAGCATGCTCTTGTTTG ATCCAACGTATGATCAGCTC | | CCTGTTCTCCCTTCTACATG  AACCTGGGTGATATGTATGC | | | TGAATGTCTCATTGCATTGC GCATTCACACCGATACATTC | | AACAAATAATGCCGCCAATT ACCAAGAAATGATCCTGCAT |
| **Primer name** | S62_AGC | S64_TCA | S74_TC | S54_CAG | S77_GA | | S79_GAA | | S85_CT-TG | | S89_AG | | S84_GT | | S66_TGC | | S55_CAG | | S48_AGG | | S92_AGAA | | | S88_GA | | S58_AGA |
| **Reference** | | ([Ranade et al. 2015](#_ENREF_3)) | ([Ranade et al. 2015](#_ENREF_3)) | ([Rungis et al. 2004](#_ENREF_4)) | ([Ranade et al. 2015](#_ENREF_3)) | | ([Rajora and Mann 2021](#_ENREF_2)) | | ([Ranade et al. 2015](#_ENREF_3)) | | ([Rajora and Mann 2021](#_ENREF_2)) | | [Ranade et al. 2015](#_ENREF_38)) | | ([Rajora and Mann 2021](#_ENREF_2)) | | ([Rajora and Mann 2021](#_ENREF_2)) | | ([Rajora and Mann 2021](#_ENREF_2)) | | ([Ranade et al. 2015](#_ENREF_3)) | | ([Ranade et al. 2015](#_ENREF_3)) | ([Ranade et al. 2015](#_ENREF_3)) | | ([Ranade et al. 2015](#_ENREF_3)) | | | ([Ranade et al. 2015](#_ENREF_3)) |
| **PIC/ PIC+** | | 0.16/0.58 | 0.13/0.34 | 0.67/0.81 | 0.61/0.74 | | 0.76/0.84 | | 0/0.31 | | 0.12/0.22 | | 0/0.86 | | 0.19/0.52 | | 0.67/0.81 | | 0.3/0.87 | | 0/0.39 | | 0,34/0.65 | 0.81/0.89 | | 0.22/0.54 | | | 0.74/0.88 |
| **He/ He+** | | 0.17/0.66 | 0.14/0.4 | 0.72/0.85 | 0.69/0.83 | | 0.8/0.8 | | 0/0.36 | | 0.23/0.12 | | 0/0.89 | | 0.57/0.56 | | 0.85/0.83 | | 0.35/0.89 | | 0/0.43 | | 0,37/0,67 | 0.85/0.92 | | 0.24/0.57 | | | 0.8/0.91 |
| **Ho/  Ho+** | | 0.18/0.21 | 0.15/0.41 | 0.74/0.85 | 0.56/0.71 | | 0.75/0.84 | | 0/0.21 | | 0.13/0.13 | | 0/0.82 | | 0.23/0.38 | | 0.67/0.5 | | 0.37/0.83 | | 0/0.52 | | 0.35/0.72 | 0.83/0.84 | | 0.16/0.58 | | | 0.48/0.43 |
| **Na/ Na+** | | 4/8 | 3/4 | 4/14 | 6/14 | | 10/12 | | 1/13 | | 2/8 | | 1/16 | | 3/12 | | 7/10 | | 2/11 | | 2/16 | | 7/24 | 4/24 | | 1/12 | | | 5/20 |
| **Allele  size** | | 476-483 | 456-459 | 454-466 | 492-507 | | 444-472 | | 477 | | 479-491 | | 486 | | 312-483 | | 457-469 | | 429-436 | | 437-443 | | 470-488 | 480-504 | | 476-485 | | | 482-506 |
| **Motif** | | (CAG)8 | (TCA)5 | GCAG (6) | (TCC)7 | | (GA)9AA(GA)7 | | (AG)6 | | (TCG)6 | | (TGCAA)3 | | (TTA)6 | | (CTG)9 | | (TCC)11 | | (CAG8) | | (GAA)7 | (AGA)8 | | (GCA)8 | | | (AGG)10 |
| **Primer  Mix** | | 3 | 3 | 3 | 3 | | 3 | | 3 | | 3 | | 3 | | 3 | | 3 | | 3 | | 3 | | 4 | 4 | | 4 | | | 4 |
| **Forward Reverse** | | CTCGCTTCAAAAATGACAGG TGAAGATGTCTGATGATGGC | CCGACTGTCATTCACTAGAG TTGCAGCGGGAATATTACTT | GAAATCCCTCTCACACACAA ATCCCAACATTCACAAATGC | ACTTCATCTACCCCTACGTT CTCGGAGAAGAGATTCTGTG | | CAGCAAATCCACATCCATTT TGTTTAGTGGTACTTGCTGG | | TCTACGAGAAAAAGCACCTC CGAGACTGATGCAAAAATGG | | AAGGGAATTCTGTTCTGTCC CTCAGTCCAAGGGAAAAACT | | TAACAGCAGGCAGAATTCTT CACACTCATACTTGACCCTT | | TCACTACAGACCAGATGGAT TATTCAAGAAGGGCCATGAC | | ACTAGACCACACAAAAACGA CTAGAGCTCTGGATTGACAC | | ATCGCCTGTGTACTTCAATT TGGAGATTCCCTTGAACATG | | GTCTCAGCATTACCGACTG TTTGGCTGTTTTCTTCTAGC | | CGTCCTCAAAGAAGAAGTCA GTTTGGGATCCTTTAGCTCT | TGGTCAGTGGTTTTCATGAT TATCTAGGCTGTCTTTGCAC | | CTCGGCACTTTTCTTCTGTA GCAGAAATTCCAGCACATG | | | CGATCTTCTTCCTCACCTTC TGTCTCCGGTTGTTTACTTT |
| **Primer name** | | S57_AGA | S67_TCA | S69_GCAG | S50_TCC | | S75_GA | | S87_AG | | S78_TCG | | S91_TGCAA | | S80_TTA | | S81_CTG | | S83_TCC | | S46_CAG | | S60_AGA | S53_AGA | | S59_AGA | | | S61_ACG |

### S1. continued

| Reference | ([Ranade et al. 2015](#_ENREF_3)) | ([Ranade et al. 2015](#_ENREF_3)) | [Ranade et al. 2015](#_ENREF_38)) | [Ranade et al. 2015](#_ENREF_38)) | [Ranade et al. 2015](#_ENREF_38)) | [Ranade et al. 2015](#_ENREF_38)) | [Ranade et al. 2015](#_ENREF_38)) | ([Rungis et al. 2004](#_ENREF_4)) | ([Rungis et al. 2004](#_ENREF_4)) | ([Rajora and Mann 2021](#_ENREF_2)) | ([Rajora and Mann 2021](#_ENREF_2)) |
| --- | --- | --- | --- | --- | --- | --- | --- | --- | --- | --- | --- |
| PIC/ PIC+ | 0.73/0.77 | 0.25/0.6 | - | - | - | - | - | - | - | - | - |
| He/ He+ | 0.78/0.81 | 0.3/0.64 | - | - | - | - | - | - | - | - | - |
| Ho/  Ho+ | 0.74/0.78 | 0.3/0.55 | - | - | - | - | - | - | - | - | - |
| Na/ Na+ | 7/15 | 2/15 | - | - | - | - | - | - | - | - | - |
| Allele  size | 474-495 | 481-493 | - | - | - | - | - | - | - | - | - |
| Motif | (AGG)9 | (AGC)8 | (GAG)7 | (AGG)8 | (CAC)7 | (AAT)7 | (GCA)7 | (AAG)6 | (ATT)6 | (TA)9TC(TG)5 | (TCC)7 |
| Primer Mix | 4 | 4 | Failed in multiplex | Failed in multiplex | Failed in multiplex | Failed in multiplex | Failed in multiplex | Failed in multiplex | Failed in multiplex | Failed in multiplex | Failed in multiplex |
| Forward Reverse | CTCTTAGTCTCTCACGAGGA  TAATGGGGAGCTTCTTTTCC | CATAATCGAGCAAACTGAGCATC TCAGGTGTGTTTCCATCTTT | CTCATGGCTCTGATCTGATC TTGGATGTTCTGATGGACTG | TTCTTCTCAGCATGCTCTTG ATCCAACGTATGATCAGCTC | CATAGACGATGAAACGGACT  AACATAGAAAGCCTGAACGT | TCTGGCACTCAATATCCTTG  CCCTCGTCCAAGATAAACAA | CTCGGCACTTTTCTTCTGTA  GCAGAAATTCCAGCACATG | AAGAGGGAAGAAGTGCTCT  GCACAATGTTAAGGAAGTCG | TTATTCAAGAAGGGCCATGA  TCACTACAGACCAGATGGAT | GCAGAGAAAATCATGGAAGC  AGAACAAAGGTGTCTGGTTT | ATCCGATCCAATGGACAAAA  CACATGAGGAGGCTGATAAA |
| Primer name | S45_AGG | S49_AGC | S47_GAG | S48_AGG | S51_CAC | S52_AAT | S59_GCA | S68_AAG | S71_ATT | S76_TA-TG | S82_TCC |

“+” indicates values from sequence-based allele calling (WAI); values without “+” are from length-based genotyping.

### S1. continued

| **PIC/ PIC+** S2. Summary of SSR markers and their characteristics | 0.1/0.96 | 0.02/0.46 | 0.6/0.94 | | 0.73/0.92 | | 0.62/0.95 | | 0.03/0.85 | | 0.04/0.29 | | 0.23/0.9 | 0.8/0.89 | | 0.01/0.61 | | 0.53/0.83 | | 0.02/0.36 | | 0.89/0.96 | | 0/0.24 | | 0.06/0.79 | | 0/0.67 | |
| --- | --- | --- | --- | --- | --- | --- | --- | --- | --- | --- | --- | --- | --- | --- | --- | --- | --- | --- | --- | --- | --- | --- | --- | --- | --- | --- | --- | --- | --- |
| **He/ He+** | 0.11/0.97 | 0.02/0.5 | 0.65/0.97 | | 0.77/0.93 | | 0.68/0.97 | | 0.03/0.87 | | 0.04/0.3 | | 0.24/0.92 | 0.82/0.92 | | 0.02/0.65 | | 0.6/0.86 | | 0.02/0.38 | | 0.9/0.97 | | 0/0.26 | | 0.06/0.81 | | 0/0.72 | |
| **Ho/  Ho+** | 0.11/0.89 | 0.02/0.5 | 0.63/.71 | | 0.22/0.2 | | 0.72/0.74 | | 0.04/0.78 | | 0.02/0.1 | | 0.26/0.8 | 0.74/0.65 | | 0.019/0.68 | | 0.85/0.92 | | 0.02/0.18 | | 0.87/0.9 | | 0/0.04 | | 0.06/0.71 | | 0/0.61 | |
| **Na/ Na+** | 5/45 | 3/8 | 7/29 | | 11/26 | | 9/36 | | 2/17 | | 4/6 | | 4/26 | 7/15 | | 2/14 | | 5/18 | | 2/10 | | 18/40 | | 1/3 | | 3/18 | | 1/14 | |
| **Allele  size** | 420-431 | 410-422 | 407-427 | | 405-421 | | 401-411 | | 403-405 | | 324-402 | | 399-414 | 402-444 | | 399-400 | | 461-406 | | 403-404 | | 386-414 | | 395 | | 416-429 | | 500 | |
| **Motif** | (ATTT)5 | CTAG (5) | (TTAT)6 | | (GATA)7 | | (TTTTG)4 | | (AGATA)4 | | ( TTATC )4 | | (AATAC)5 | (ATGGT)7 | | ( TTTTA )4 | | (GGAAA)4 | | (AAAAG)4 | | (TTGGC)4 | | (TTCTT)4 | | (AAT)6 | | (ACAAA)4 | |
| **Primer mix** | 1 | 1 | 1 | | 1 | | 2 | | 2 | | 2 | | 2 | 2 | | 2 | | 2 | | 2 | | 2 | | 2 | | 3 | | 3 | |
| **Forward Reverse** | GGAACTATTGATCGACTCTGAT  GCTGTTACCTACCTCTGTTA | GAAATCCCTCTCACACACAA ATCCCAACATTCACAAATGC | ACAGTTGTAACTTGCCAGTA TCTACCACAAGCAACAATCA | | TGGAAGAGGTTAGGGTTAGA ATTTGACCCCATCCAATGAT | | TAATTTTTGGAGGTTTGGCC CACGGCCATCTAACTACTAA | | GTTGCACTTCGACATGATTG TATAGGAGACCTTTTGGCAC | | TATGTTCCCCCTGTCTTTTG GGTACTCCAAGGTCAATGAG | | TGATGGTCATGTGATTTGGT TGTCTCAATAACAAGAAGAGT | TCTACGAGAAAAAGCACCTC CGAGACTGATGCAAAAATGG | | CTTTTTCTTAGGCCATTGGG CAAAGGTGGGCAATTTATGG | | AAGGGAATTCTGTTCTGTCC CTCAGTCCAAGGGAAAAACT | | CCCTCCCATTCCATTTCATT GCAAAATACATACATCGGCC | | TCACTACAGACCAGATGGAT TATTCAAGAAGGGCCATGAC | | ATCCCTCTTCTTTTCCTTGC AACTGTTGGGATTAGGTGAT | | CCGACTGTCATTCACTAGAG TTGCAGCGGGAATATTACTT | | ACTAGACCACACAAAAACGA CTAGAGCTCTGGATTGACAC | |
| **Primer name** | S20_ATTT | S39_CTAG | S42_TTAT | | S38_GATA | | S106_TTTTG | | S107_AGATA | | S109_TTATC | | S110_AATAC | S95_ATGGT | | S114_TTTTA | | S97_GGAAA | | S98_AAAAG | | S99_TTGGC | | S105_TTCTT | | S32_AAT | | S1_ACAAA | |
| **PIC/ PIC+** | | 0/0.87 | 0/0.69 | 0.28/0.83 | 0.04/0.71 | | 0.36/0.7 | | 0.61/0.95 | | 0.13/0.58 | | 0/0.87 | | | 0.3/0.63 | | 0.14/0.89 | | 0..08/0.73 | | 0.09/0.32 | | 0,02/0.93 | | 0.4/0.61 | | 0.37/0.88 | |
| **He/ He+** | | 0/0.9 | 0/0.72 | 0.32/0.86 | 0.04/0.75 | | 0.43/0.74 | | 0.65/0.96 | | 0.14/0.62 | | 0/0.89 | | | 0.33/0.67 | | 0.14/0.9 | | 0.09/0.77 | | 0.09/0.34 | | 0.02/0.94 | | 0.46/0.64 | | 0.44/0.9 | |
| **Ho/  Ho+** | | 0/0.32 | 0/0.67 | 0.3/0.47 | 0.02/0.2 | | 0.03/0.05 | | 0.7/0.65 | | 014/0.46 | | 0/0.56 | | | 0.31/0.64 | | 0.15/0.88 | | 0.09/0.58 | | 0.1/0.34 | | 0,02/0,66 | | 0.5/0.7 | | 0.51/0.93 | |
| **Na/ Na+** | | 1/17 | 1/13 | 3/14 | 4/11 | | 4/9 | | 9/40 | | 2/14 | | 1/17 | | | 4/12 | | 4/24 | | 3/12 | | 3/8 | | 2/26 | | 3/13 | | 10/28 | |
| **Allele  size** | | 482 | 478 | 461-462 | 438 | | 411-420 | | 441-445 | | 440 | | 473 | | | 401-411 | | 403-406 | | 396-413 | | 397-414 | | 400 | | 400-422 | | 388-436 | |
| **Motif** | | (TCT)6 | (CATCA)4 | (TTA)6 | (ATG)9 | | (TTC)7 | | (TAAAA)5 | | (AGA)6 | | (TTTCC)4 | | | ( AG4CA )4 | | ( AGATA )4 | | ( TTTTC )4 | | (TTTTC)4 | | (TGTTA)4 | | ( TTCTT )4 | | ( ATCAT )4 | |
| **Primer  Mix** | | 3 | 3 | 3 | 3 | | 3 | | 3 | | 3 | | 4 | | | 4 | | 4 | | 4 | | 4 | | 4 | | 4 | | 4 | |
| **Forward Reverse** | | ATCGCCTGTGTACTTCAATT TGGAGATTCCCTTGAACATG | CACCTTGCAACTGTGAATTT TGAAACCCTTGGATTTGGAA | GTCAGCTTCGCTATTCCTAA AGGAACTCAACTTTGCAAAG | GATGAGCTGCCTGATCTAAA TTGCAGGAATCCAACACTTT | | AAACACAGTCCTCTCTTTTT ACTTAACTCCATGCTTGGTTA | | TGCATGAGGGTTTTGATACA CTGCTAGCTTACTCCTTTGT | | CTAACATTAGACGCCCATCA GCTCTTCCAAGACTACAGAG | | AAAACTTCTGCTACTACGGG AACACCAACCTGATTCATCA | | | GATTGATGTCTGCGTCCC CAGCGACAGTAGCAATGG | | GTTTTTGGGGGTAAGCTTTC TTGTGGTCATTAGCTTGACA | | AGATTGGACTGTTTGGTCAA ACCCAATAGAATGTCGAACA | | AAATACGGAATGATGGCCTA GACCTATGTACCAAAGAGGG | | ATTGGAAAGTGGGAGAACTT TCCCTCACTTAAAGAGTCCA | | AGGTTACTCAAGAGGTCTCC ATATACATTGGGGGATGGGA | | TGTGTTGCCCAATAGGTTTA GGGTTTAGAGCTCGATTGTA | |
| **Primer name** | | S9_TCT | S19_CATCA | S11_TTA | S23_ATG | | S33_TTC | | S35_TAAAA | | S24_AGA | | S18_TTTCC | | | S115_AGCCA | | S116_AGATA | | S118_TTTTC | | S100_TTTTC | | S101_TGTTA | | S102_TTCTT | | S112_ATCAT | |

### S2. continued

| **PIC/ PIC+** | 0.56/0.94 | 0.03/0.88 | 0.38/0.93 | 0.49/0.89 | 0.67/0.84 | 0.36/0.94 | - | - | - | - | - | - | - | - | - |
| --- | --- | --- | --- | --- | --- | --- | --- | --- | --- | --- | --- | --- | --- | --- | --- |
| **He/ He+** | 0.61/0.95 | 0.03/0.9 | 0.42/0.95 | 0.54/0.92 | 0.71/0.86 | 0.37/0.94 | - | - | - | - | - | - | - | - | - |
| **Ho/  Ho+** | 0.64/0.87 | 0.03/0.82 | 0.52/0.59 | 0.71/0.95 | 0.29/0.34 | 0.15/0.37 | - | - | - | - | - | - | - | - | - |
| **Na/ Na+** | 7/34 | 1/24 | 10/25 | 8/21 | 9/29 | 7/38 | - | - | - | - | - | - | - | - | - |
| **Allele  size** | 382-403 | 448-453 | 427-504 | 368-488 | 406-415 | 399-410 | - | - | - | - | - | - | - | - | - |
| **Motif** | (TGAAT)4 | ( ATTTT )4 | ( CAT )4 | (CATGC)4 | (AAAAG)4 | (CTTCT)4 | (AAAAT)4 | (AATAA)4 | (ATA)7 | (TAA)6 | (ATG)6 | (TTTA)5 | (TCTTT)5 | (ATT)8 | (ATA)6 |
| **Primer  Mix** | 4 | 4 | 4 | 4 | 4 | 4 | Failed in multiplex | Failed in multiplex | Failed in multiplex | Failed in multiplex | Failed in multiplex | Failed in multiplex | Failed in multiplex | Failed in multiplex | Failed in multiplex |
| **Forward Reverse** | GAAAGCCTGAGATGTTCTGA TTCTGTTTTGAACTTGGTGC | CCAAACTCAAAGACCCCTAA TCATGCCTTGTTAGTCATGT | GGGAAGTAGAAGCATCCATA TCCCTCCATAAGATCCTCTT | CAGCAAATCCACATCCATTT TGTTTAGTGGTACTTGCTGG | TGCAGAAGTATAATTGAGCCA GTGTATGAGACTTGTGAGACA | TTGTCAATGAATTCACTTCCC ATTAAGTGTAAGGAAATGTGAGA | TGTTTGGGGTTGAGACAATT TGAACACTGACAAAGAAAACT | GGTGAAAGGATCCGAGATTT TGTTCCTGGATATGCATTCT | CCTATCCCCCTCTGAATTTG TGTTTCTATTCTTCCTATGTTCAA | TGAAGTTGACATGAGCAAATG TGAACCTCCATATTCCAACAA | TGCTTAAGTCTTGCAAATCT ATGGTGTTCGATAGGGAAAC | GATGAGAACGGTGGAGAAG CCTCCCGATTATCCTAGTCTA | GCCACTTGACCAAGATTAGA AGCATGGATAGATGGATCAT | TGCTTTTCCAAGTCAATATAAGG TCCAAGTCTTATAATCTAAATTTA | AATGCCACTGTTTTCGATTC TTTAATGGTGGGGGAGTAAC |
| **Primer name** | S96_TGAAT | S121_ATTTT | S13_CAT | S93_CATGC | S113_AAAAG | S123_CTTCT | S2_AAAAT | S4_AATAA | S8_ATA | S10_TAA | S12_ATG | S15_TTTA | S17_TCTTT | S25_ATT | S27_ATA |

### S2. continued

| **PIC/ PIC+** | - | - | - | - | - | - | - | - | - |
| --- | --- | --- | --- | --- | --- | --- | --- | --- | --- |
| **He/ He+** | - | - | - | - | - | - | - | - | - |
| **Ho/  Ho+** | - | - | - | - | - | - | - | - | - |
| **Na/ Na+** | - | - | - | - | - | - | - | - | - |
| **Allele  size** | - | - | - | - | - | - | - | - | - |
| **Motif** | (AGA)7 | (ATAAA)4 | (TTATT)4 | (TTAA)4 | (TAAT)4 | (TGTT)4 | (TATT)4 | (TTAG)4 | (TTCA)4 |
| **Primer  Mix** | Failed in multiplex | Failed in multiplex | Failed in multiplex | Failed in multiplex | Failed in multiplex | Failed in multiplex | Failed in multiplex | Failed in multiplex | Failed in multiplex |
| **Forward Reverse** | TTCCTCCTGAGCCTTAGATT ATGGAGCTGAGAGAGATCAT | ACATGTTTGCCATCTCCTTA TCATTCCTTTAGGTTTCCCC | CCAAGACCCCATGCATAATA GCAACCATCAACTCTCTCTA | AACCCTGTGTCTTTTCCATT AACCCTGTGTCTTTTCCATT | GGGCTATAGCGAAGAGAAAT GGGCTATAGCGAAGAGAAAT | CAAACACGAGCTAGTTTCAC CAAACACGAGCTAGTTTCAC | CCAGTTCATCAACCATTTGG CCAGTTCATCAACCATTTGG | AAGTAGTGTTGTCAATTACCT AAGTAGTGTTGTCAATTACCT | TATAACCACAGTTCTTCCGC TATAACCACAGTTCTTCCGC |
| **Primer name** | S31_AGA | S94_ATAAA | S103_TTATT | S126_TTAA | S128_TAAT | S132_TGTT | S134_TATT | S135_TTAG | S136_TTCA |

### S2. continued

“+” indicates values from sequence-based allele calling (WAI); values without “+” are from length-based genotyping.

| **Organism** | *P.abies* | *P.glauca* | *P.glauca* | *P.abies* | *P.abies* | *P.abies* | *P.abies* | *P.abies* | *P.abies* | *P.abies* | *P.glauca* | *P.glauca* | *P.glauca* | *P.abies* |  |
| --- | --- | --- | --- | --- | --- | --- | --- | --- | --- | --- | --- | --- | --- | --- | --- |
| **Gene** | Disease resistance | Disease resistance | Cold-shock | Disease resistance | Dehydration stress | Dehydration response | Respiratory burst oxidase | PIN-like auxin efflux carrier | Transcription factorembryonic maturation and development | Water transport (major intrinsic) | Dhn-1 Putative dehydrin | Cinnamyl alcohol dehydrogenase, Lignin synthesis | Homeodomain Leucine Zipper Protein | R2R3- MYB transcription factor : Lignin biosynthesis |  |
| **Accession  Number** | MA_10059887g0010 | MA_10141852g0010 | MA_1542g0010 | AY635997.1 | AY961933.1 | EU332957.1 | KT192590.1 | FJ031883.2 | AF175576.1 | AJ133748.1 | AF109916.1 | BT112280.1 | BT117426.1 | BT108136.1 |  |
| **Primer  Mix** | 1 | 1 | 1 | 1 | 1 | 1 | 1 | 1 | 1 | 1 | 1 | 1 | 1 | 1 |  |
| **Reverse** S3. Summary of EPIC_ markers and their characteristics | CGCTGTCTCTTCTGCAAC | CAGCTTACCTCCGATTCG | GACTGCCCTCTAAACCCT | GGAAGCTTGAATATCTGGACA | CCCTCAAGGAGGTTGAAA | TAATACCTGGTGGCGTTCAT | AGCGAATAGGTTGTCCAAAT | ATTTGCAGTCGACAGTAGAG | CAGGCCATTCGATCTCAC | TTCTTCTCCACGCTCATCTT | TCCCACACTGATCTGAAGA | CCACTCCCACCACTTCAT | GTATCAATGCCTGCCAGT | GCGCCATATTACCAAATACG |  |
| **Forward** | TCCAGAGCAGCATTCAATTT | CACCTTTTCGCTGTTGAAG | GGAGCATGCCTGATTCTC | TTCGCCGAGATATATGACTG | AAAGGAAGGATCATGGGAG | TGTAATTTGGGAGATCCA | TCTGAAATGGGCTCTTCTTC | ACTGTAATACAGCACTCACA | CGTCTCGAGTATGGAACTTG | GTTGGTGGTGAACTTGAGTA | TCTCCGCATGAAGTAAAACA | CCATTTGTCCCCTTACACTTA | GAGGTCTGAAATGGCTTGAA | TCTCGTTATCAGTTCTTCCG |  |
| **Primer name** | 1-SprEPIC_ | 2-SprEPIC_ | 3-SprEPIC_ | 4-SprEPIC_ | 5-SprEPIC_ | 6-SprEPIC_ | 10-SprEPIC_ | 11-SprEPIC_ | 12-SprEPIC_ | 14-SprEPIC_ | 16-SprEPIC_ | 17-SprEPIC_ | 18-SprEPIC_ | 19-SprEPIC_ |  |

### S3. continued

| **Organism** | *P.sitchensis* | *P.sitchensis* | *P.abies* | *P.glauca* | *P.glauca* | *P.glauca* | *P.glauca* | *P.abies* | *P.abies* | *P.abies* | *P.abies* | | *P.abies* | *P.abies* | | *P.abies* | *P.abies* |
| --- | --- | --- | --- | --- | --- | --- | --- | --- | --- | --- | --- | --- | --- | --- | --- | --- | --- |
| **Gene** | R2R3- MYB transcription factor : Lignin biosynthesis | R2R3- MYB transcription factor : Lignin biosynthesis | PRC2 Growth control | Sucrose Transporter | Class III Homeodomain Leucine Zipper (HD-Zip III) | CRY-2 (Cryptochrome) | Phytochorome gene | Homeodomain-leucine zipper transcription factor HB-3 | Mother of flowering time 1 (MFT2) | CONSTANS-like gene, seasonal growth and dormancy | Partial phyo gene for phytochrome O | | CRY gene | phynrl gene for Phytochrome N | | phynrl gene for Phytochrome N | KNOX (KNOTTED-like homeobox) ; meristematic actvity |
| **Accession  Number** | BT108136.1 | GT124438.1 | [OP485460.1](https://www.ncbi.nlm.nih.gov/nucleotide/OP485460.1?report=genbank&log$=nuclalign&blast_rank=1&RID=F13WZ3NN016) | [MH281472.1](https://www.ncbi.nlm.nih.gov/nucleotide/MH281472.1?report=genbank&log$=nuclalign&blast_rank=1&RID=F0E0W01T016) | [DQ258643.1](https://www.ncbi.nlm.nih.gov/nucleotide/DQ258643.1?report=genbank&log$=nuclalign&blast_rank=1&RID=F1460C13016) | [BT115482.1](https://www.ncbi.nlm.nih.gov/nucleotide/BT115482.1?report=genbank&log$=nuclalign&blast_rank=2&RID=F14E1H3B016) | [BT112006.1](https://www.ncbi.nlm.nih.gov/nucleotide/BT112006.1?report=genbank&log$=nuclalign&blast_rank=1&RID=F0EH2HSA013) | [ABB93495.1](http://www.ncbi.nlm.nih.gov/gquery/gquery.fcgi?term=gi%7C82908650%7Cgb%7CABB93495.1%7C) | AEH59566.1 | AM267499.1 | AM267621.1 | | AM267816.1 | AM267924.1 | | AM267924.1 | DQ257835.1 |
| **Primer  Mix** | 1 | 1 | 2 | 2 | 2 | 2 | 2 | 2 | 2 | 2 | 2 | | 2 | 2 | | 2 | 2 |
| **Reverse** | GGAATGGGATTCACTGATGT | CAGACTAATGGATGTTTCCCT | GGGTCTTGTTGTCTTCTTCA | AGAAGTAAAGGTTGCTGTCA | TACAACACCACGCACATATT | CTTACCCGATGGTCATGAAT | TGTCAGTGGAAGAGGTTCTG | GCTAAATGTCCGCAGAACAG | CAGTCGACGGAGGAAGAATTC | CTGCACAACATATTTCGGCATC | ACCTTGCAAAGCCAAGTAGAG | | ATATCATCTCGCCCTCTCAAG | GTATCTGAACCTCAGTAGGAG | | AATTACAGTGGCGTCGTGGG GTATCTGAACCTCAGTAGGAG | TCGAAATCATGTGACCTGTC |
| **Forward** | T AAAAGATTGCAACCAGAGGG | AATGGAGAAGTACACTGCTG | TTGAAAATGTTGCAACTGCT  GCAACCATCAACTCTCTCTA | TCACTTGGCCTAATGTTGAA | GTGGAATCGATGAAAATGCA | CCTAAACCTTCTTCTGTACCA | TGCTCGAGCAAGCATTAA | ATACAACCTTGCGAAGGTGG | CAGTCACAGTGGTAGTACTAG | CTGTACTCTATTGCAGAGCTC | GAGGTGCTAAACATGATCCCA | | CCAACTATCCACTACCCATTG | GTTGTCATGCTCAATACATGGC | | TTCAGAAGCTAAGCGAGCGG | CTTCTCAGCAGAGTAGTACAG |
| **Primer name** | 20-SprEPIC_ | 21-SprEPIC_ | 22-SprEPIC_ | 24-SprEPIC_ | 25-SprEPIC_ | 27-SprEPIC_ | 28-SprEPIC_ | 31-SprEPIC_ | 34-SprEPIC_ | 36-SprEPIC_ | 37-SprEPIC_ | | 38-SprEPIC_ | 40-SprEPIC_ | | 41-SprEPIC_ | 44-SprEPIC_ |
| **Organism** | *P.abies* | *P.abies* | *P.abies* | *P.abies* | *P.abies* | *P.abies* | *P.glauca* | *P.abies* | *P.abies* | *P.abies* | *P.abies* | | *P.abies* | | |
| **Gene** | Phytochrome P mRNA | E-alpha-bisabolene synthase (TPS-Bis) mRNAbiosynthesis | Lanalool synthase (TPS-Lin) | 1-deoxy-D-xylulose 5-phosphate synthase type II CoA Ligase gene(DXS2A) mRNA | CoA Ligase gene | Carene synthase | CRY-1 | PSprEPIC_C-1b phosphoenolpyruvate carboxylase | Mother of flowering time 1 (MFT2) | Partial phyo gene for Phytochrome O | Beta glucosidase gene | | Leucoanthocyanidin reductase (LAR) gene, proanthocyanidin synthesis | | |
| **Accession  Number** | KM516090.1 | AY473619.1 | [AY473623.1](https://www.ncbi.nlm.nih.gov/nucleotide/OP485460.1?report=genbank&log$=nuclalign&blast_rank=1&RID=F13WZ3NN016) | EF688332.2 | JX542481.1 | AF461460.1 | BT109619.1 | - | AEH59565.1 | AM267712.1 | BT114253 | | KT592308.1 | | |
| **Primer  Mix** | 2 | 2 | 2 | 2 | 2 | 2 | 3 | 3 | 3 | 3 | 3 | | 3 | | |
| **Reverse** S3. continued | TTTCAACCCTCTCCACAGACT | CTCTTGCGAGAGGAGTTGC | CCTGGTAGCTGTGAATGTC | CAATATGCTTCGGAGACAAAC | TTTATTTGAGCGTTCCGGACG | CGATTACGAGGTGACACAC | GCTGGATCAAATTTGTAGCC | TGCTGCCATCATTCTTGCAAG | AGCATCTGGGTCTGTCATTAC | AGCGAGAAGCCTGAGGGATAT | AGGAAATATGCGCGACCAGGA | | CCGACAAAGAAAGTCCACAAC | | |
| **Forward** | TTGATACTAAGGACCTTTGGCC | GATGGGACCTCTCTTTTACAG | ACTGTAAACGAAATGGCGCGA | GAGTTGCGATTCTAGGGTTTG | CAGAAATTCAACCTGACGACG | TTCTTTGTTTCATTGCTGGC | GGGTTGACAGCGATTACTTT | CAGATGAAATTCGGCGTACTC | ATTTACATGCCATGAGACACC | TACAGTGAGAACGCAGTGG | AGGACCCAGCATTTGGGATAC | | TCTACATAGAAAGGAGCAAGG | | |
| **Primer name** | 52-SprEPIC_ | 57-SprEPIC_ | 59-SprEPIC_ | 64-SprEPIC_ | 45-SprEPIC_ | 46-SprEPIC_ | 30-SprEPIC_ | 32-SprEPIC_ | 33-SprEPIC_ | 39-SprEPIC_ | 42-SprEPIC_ | | 43-SprEPIC_ | | |
| **Organism** | *P.abies* | *P.abies* | *P.abies* | *P.abies* | *P.glauca* | *P.abies* | *P.abies* | *P.abies* | *P.abies* | *P.abies* | | *P.abies* | | |
| **Gene** | Picea abies (-)-alpha/beta-pinene | E-alpha-famesene synthase (TPS-Far) mRNA | KCBP-like kinesin mRNA | Circadian clock associated | Class III Homeodomain Leucine Zipper (HD-Zip III) | AP2-related transcription factor (AP2L3) | Translation elongation factor | Phytochrome mRNA | KNOTTED1-like homeodomain protein 3 (HBK3) mRNA | TUDOR protein with multiple SNc domains (tudor-sn gene) | | 1,2-deoxy-D-arabino-heptulosonate 7-phosphate synthase (DAHP) | | |
| **Accession  Number** | AY473622.1 | AY473627.1 | AY515262.1 | KC311521.1 | DQ258678.1 | DQ089703.1 | AJ132534.1 | U60264.1 | AF483278.1 | AM398207.1 | | HQ441161.1 | | |
| **Primer  Mix** | 3 | 3 | 3 |  | 3 | 3 | 3 | 3 | 3 | 3 | | 3 | | |
| **Reverse** | TGTTTGGTTTGAGAAGCTCCC | AGCATCTTCCTCGGTTGATC | CTACGAGCGTCCATCGTTCTT | ACCTCGGCCTAAAAGGAA | CCTGTCCAGAGATATGTTTCT | GGAATGTATTCCACTCCAACC | TTTGAGTACTTGGGAGTAGTG | TTCTCCTCCTGTATGCCAAAT | CCTTTGCCCAGGGAGTTGA | TCTGCATATGGTTCATCACGC | | AATCATACCATAGACCAGACGT | | |
| **Forward** | CCAACGTTTGAGGAGTACTAC | CTGCCGACATTTGAGGAATA | TTAGTGCACTGGCTTCTGAAG | TTGTTTTTGCATTGTGTCGA | AAGTCCAATGTGCGGTTG | CGATCATAATCTGGATCAGCC | TGATTACTGGAACCTCTCAGG | ACTGTGCCAATTTTGGC | ATTGGGGCTCCTCCGGAAG | CAGGGATTTTGAAGAGAGATCA | | TATTGTCAAGCTGCTGCAACC | | |
| **Primer name** | 58-SprEPIC_ | 61-SprEPIC_ | 62-SprEPIC_ | 23-SprEPIC_ | 26-SprEPIC_ | 48-SprEPIC_ | 49-SprEPIC_ | 53-SprEPIC_ | 54-SprEPIC_ | 56-SprEPIC_ | | 65-SprEPIC_ | | |

### S3. continued

### S4. Genomic localization of EST markers in the P.abies genome

| S45_AGG  S46_CAG | MA_210959  MA_10436565 | 4034  18720  18945 | 4453  18944  19082 | No overlap  Exon  Intron |
| --- | --- | --- | --- | --- |
| S47_GAG  S48_AGG | MA_16016  MA_10432915 | 27942  9598 | 28439  11629 | CDS  Gene |
| S49_AGC | MA_941055 | 7790  8210  8308 | 8209  8307  8478 | Exon  Intron  Exon |
| S50_TCC | MA_900729 | 1031 | 2006 | Exon |
| S51_CAC | MA_92710 | 20242 | 20733 | CDS |
| S53_AGA | MA_167676 | 8756  10455 | 10454  10617 | Exon  Intron |
| S54_CAG | MA_19634 | 36958 | 37432 | CDS |
| S55_CAG | MA_62361 | 8323  8424 | 8423  9156 | Intron  Exon |
| S57_CAG | MA_13061 | 21268  22911 | 22910  23310 | Intron  Exon |
| S58_CAC | MA_10435773 | 5312 | 5787 | CDS |
| S59_GCA  S60_GAA  S61_AGG | MA_211369  MA_4008  MA_884 | 5753  26575  39102 | 6058  27177  39531 | Exon  Exon  CDS |
| S62_AGC | MA_10427730 | 6786 | 7765 | Exon |
| S64_TCA | MA_203191 | 2613 | 3090 | Exon |
| S66_TGC | MA_62451 | 8061 | 8510 | Exon |
| S67_TCA | MA_77849 | 11083  12352  12651 | 12351  12650  12955 | Intron  Exon  Intron |
| S69_GCAG  S71_ATT | MA_3179  MA_50379 | 21821  12707 | 22319  13188 | CDS  CDS |
| S74_TC | MA_943981 | 3313  4107 | 4106  4190 | Intron  Exon |
| S75_GA | MA_6653 | 3242 | 3689 | CDS |
| S76_TA_TG | MA_1400 | 16021 | 16502 | CDS |
| S77_GA | MA_177115 | 2881 | 3370 | No overlap |
| S78_TCG  S79_GAA  S80_TTA  S81_CTG  S82_TCC | MA_50261  MA_6240990  MA_50379  MA_3179  MA_60880 | 11397  21  12708  21686  7112  7435  7538  7732 | 11881  308  13188  22188  7434  7537  7731  7834 | CDS  Exon  CDS  No overlap  Exon  Intron  Exon  Intron |
| S84_GT  S85_CT-TG | MA_95775  MA_59377 | 3098  4980 | 3469  5277 | Exon  No overlap |
| S87_AG | MA_10435 | 1737 | 2310 | Exon |
| S88_GA | MA_10435 | 23864 | 24348 | Exon |
| S89_AG  S9_TCT | MA_11141  MA_27975 | 8894  10353 | 9388  10741 | CDS  No overlap |
| S91_TGCAA | MA_10191 | 16704 | 16219 | Exon |
| S92_AGAA | MA_2116 | 58164  61981 | 61980  64203  9002 | Intron  Exon  No overlap |

S5. List of intervals defined for each marker where duplication is suspected. We have provided selected examples of marker plots.

S24_AGA : 340-350, 430-450

S9_TCT : 300-310, 470-490

S11_TTA : 300-320, 450-470

S13_CAT : 410-430, 450-470

S54_CAG : 450-460, 470-475

S97_GGAAA : 360-375, 400,410

S109_TTATC : 320-330, 400-410

S113_AAAAG : 310-320, 410-420

S115_AGCCA : 300-310, 400-410


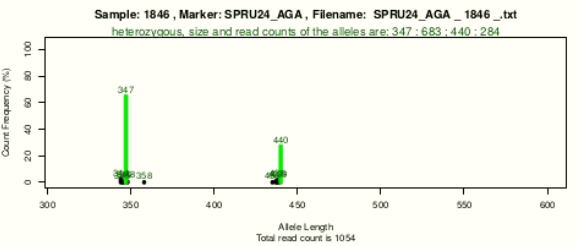


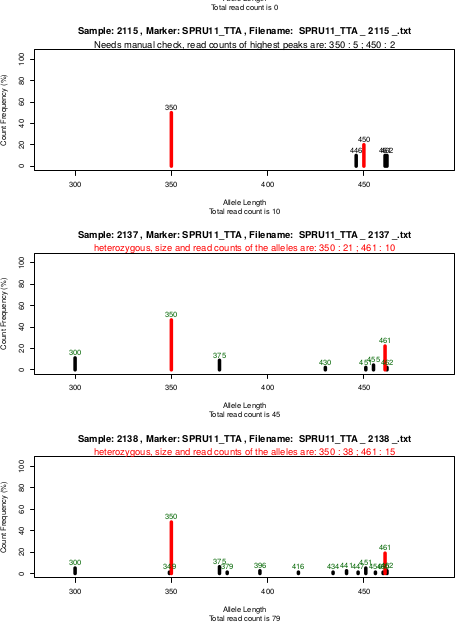

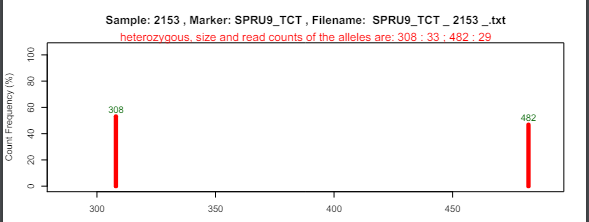


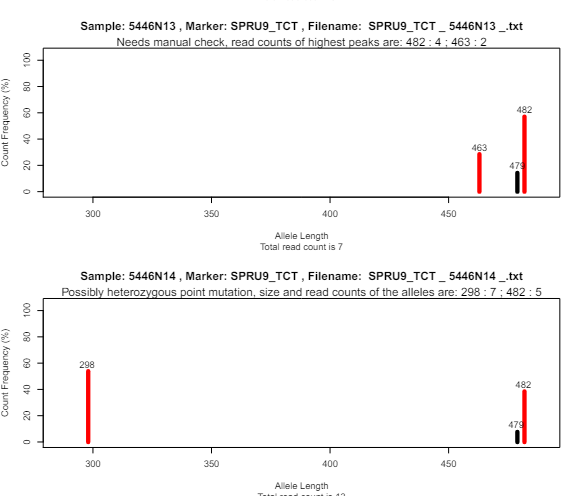


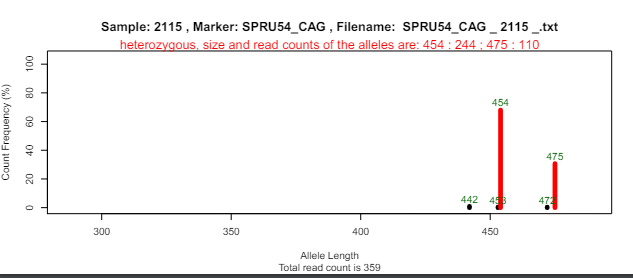


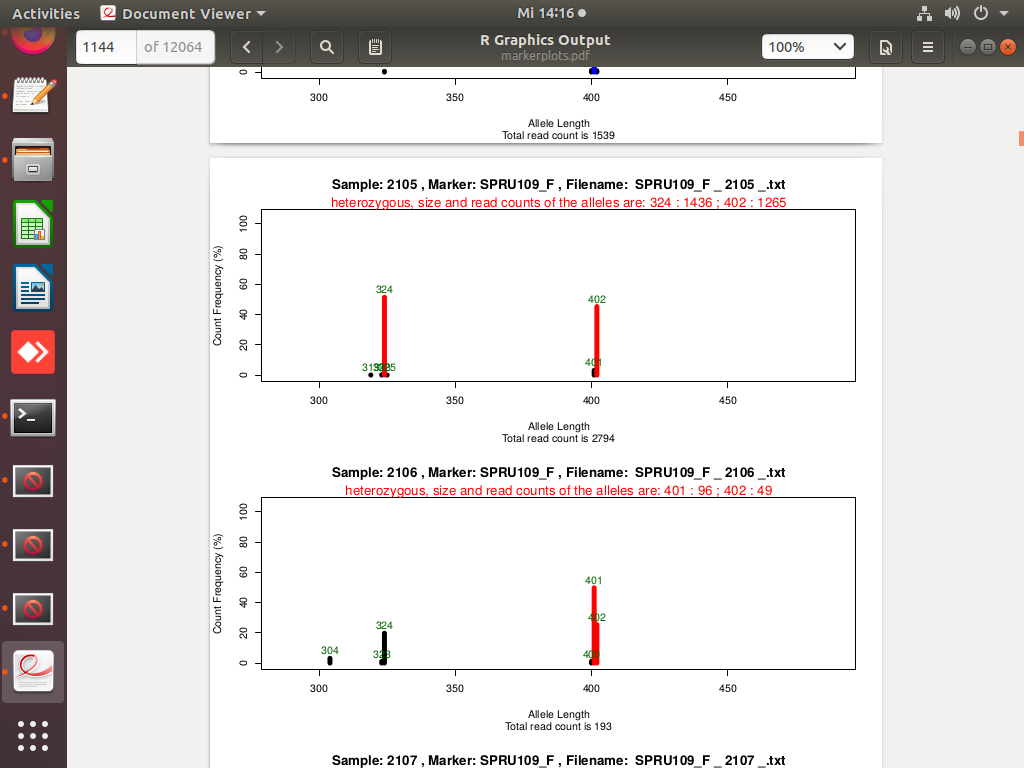


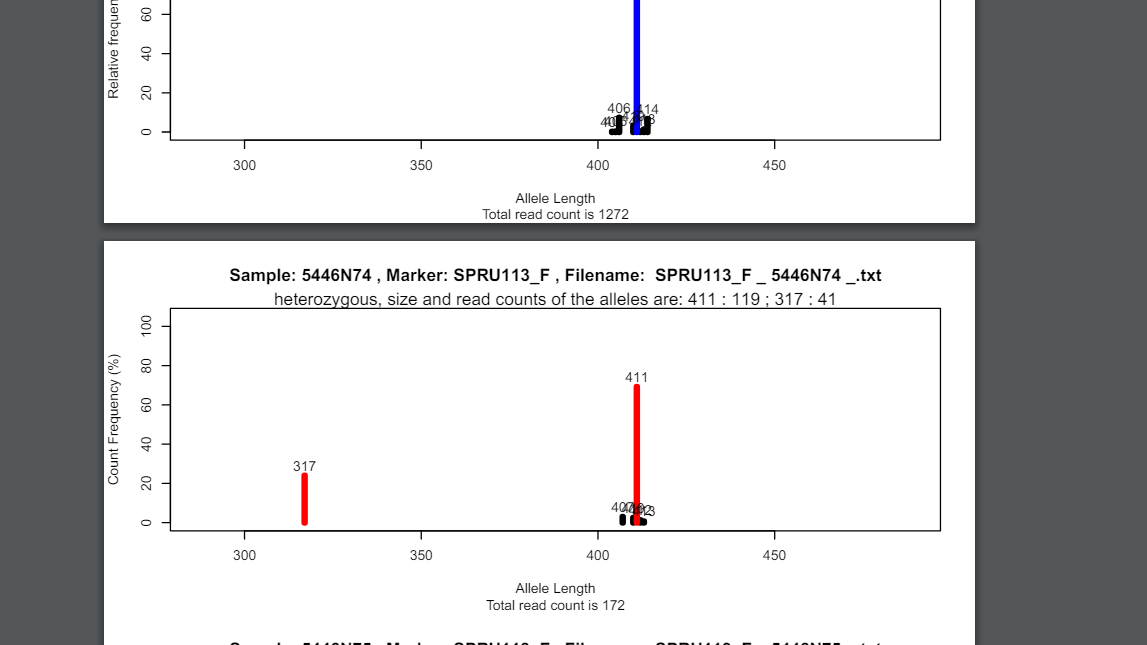


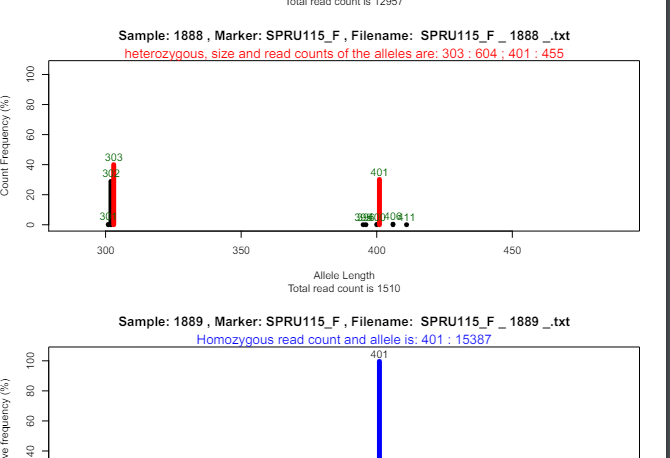


The SSR-GBAS pipeline plots allele lengths against the count frequency as ‘Marker plots’ for each marker and each sample. We visually examined these plots to manually exclude technical artefacts and choose markers that show distinct peaks with length differences that could not be explained by indels. The original pdf is over a thousand pages long and hence we have put selected plots here.

### S6. Test for deviations from Hardy-Weinberg Equilibrium (HWE) for all populations. Significant deviations are highlighted in this manner (* p < 0.05, ** p < 0.01, *** p < 0.001)

###

| Marker | H.Muhr | L.Muhr | Rothwald | Flurwald | Silbertal |
| --- | --- | --- | --- | --- | --- |
| | 1-SprEPIC_ | | --- | | 11-SprEPIC_ | | 12-SprEPIC_ | | 16-SprEPIC | | 16-SprEPICdup1_ | | 17-SprEPIC | | 18-SprEPIC_ | | 19-SprEPIC_ | | 2-SprEPIC_ | | 20-SprEPIC_ | | 22-SprEPIC_ | | 23-SprEPIC_ | | 24-SprEPICdup2_ | | 25-SprEPIC_ | | 26-SprEPIC_ | | 27-SprEPIC_ | | 28-SprEPIC_ | | 3-SprEPIC_ | | 30-SprEPIC_ | | 31-SprEPIC_ | | 32-SprEPIC_ | | 33-SprEPIC_ | | 36-SprEPIC_ | | 37-SprEPIC_ | | 38-SprEPIC_ | | 4-SprEPIC_ | | 40-SprEPIC_ | | 41-SprEPIC_ | | 42-SprEPICdup1_ | | 42-SprEPICdup2_ | | 43-SprEPIC_ | | 44-SprEPIC_ | | 45-SprEPIC_ | | 46-SprEPIC_ | | 49-SprEPICdup2_ | | 5-SprEPIC_ | | 53-SprEPIC_ | | 54-SprEPIC_ | | 57-SprEPICdup1_ | | 58-SprEPIC_ | | 59-SprEPIC_ | | 6-SprEPIC_ | | 61-SprEPICdup1_ | | 61-SprEPICdup2_ | | 62-SprEPIC_ | | 64-SprEPIC_ | | 65-SprEPIC_ | | S1_ACAAA | | S100_TTTTC | | S101_TGTTA | | S102_TTCTT | | S105_TTCTT | | S106_TTTTG | | S107_AGATA | | S109_TTATC | | S110_AATAC | | S112_ATCAT | | S114_TTTTA | | S115_AGCCA | | S116_AGATA | | S118_TTTTC | | S11dup1_TTA | | S121_ATTTT | | S123_CTTCT | | S13dup1_CAT | | S18_TTTCC | | S19_CATCA | | S20_ATTT | | S23_ATG | | S24dup2_AGA | | S32dup2_AAT | | S33_TTC | | S35_TAAAA | | S38_GATA | | S39_CATG | | S42_TTAT | | S45_AGG | | S46_CAG | | S54dup2_CAG | | S55_CAG | | S58_CAC | | S62_AGC | | S66_TGC | | S67_TCA | | S75_GA | | S77_GA | | S79_GAA | | S81_CTG | | S82_TCC | | S83_TCC | | S84_GT | | S92_AGAA | | S93_CATGC | | S95_ATGGT | | S96_TGAAT | | S97dup1_GGAAA | | S97dup2_GGAAA | | S98_AAAAG | | S99_TTGGC | | S9dup2_TCT | | | 0.679 | | --- | | mono | | 0.65 | | 0.429 | | 0.709 | | 0.612 | | 0.439 | | 1 | | 0.017* | | 0.832 | | 0.894 | | 0.002** | | 0.103 | | 0.816 | | 0.931 | | 0.894 | | mono | | 0.716 | | 0.439 | | 0.999 | | 0.024* | | 0.063 | | 0.132 | | 0.808 | | mono | | 0.857 | | 0.782 | | 0.712 | | 0.336 | | 0.132 | | 0.936 | | 0.729 | | 0.878 | | 0.352 | | 0*** | | 0.041* | | mono | | mono | | 0.756 | | 0.994 | | 0.317 | | 0.317 | | 0.001** | | 0.365 | | 0.033* | | 1 | | 0.639 | | mono | | 0.022* | | 0.002** | | 0.996 | | mono | | 0.35 | | 0.127 | | 0*** | | 0.505 | | 0.628 | | 0.949 | | 0.676 | | 0.717 | | 0.506 | | 0.317 | | 0.922 | | 0*** | | 0.532 | | mono | | mono | | 0.029* | | 0.243 | | 0.968 | | 0.079 | | 0.083 | | 0.157 | | 0.002** | | 0.287 | | 0.293 | | 0.88 | | 0.827 | | 0.002** | | mono | | 0.261 | | 0.109 | | 1 | | 0.351 | | 0.122 | | 0.091 | | 0.998 | | 0.729 | | 0.423 | | 0.351 | | 0.008** | | 0.949 | | 0.845 | | 0.003** | | 0.019* | | 0.729 | | 0.148 | | 0*** | | 0.268 | | 0.174 | | | 0.066 | | --- | | mono | | 0.078 | | 0.471 | | 0.736 | | 0.758 | | 0.864 | | 0.303 | | 0.974 | | 0.898 | | mono | | 1 | | 0.196 | | 0.874 | | 0.056 | | 1 | | mono | | 0.882 | | 0.885 | | 0.974 | | 0.974 | | 0.864 | | 0.004** | | 0.998 | | mono | | 0.349 | | 0.77 | | 0.467 | | 0.03* | | 0.597 | | 0.056 | | 0.939 | | 0.243 | | 0.027* | | 0*** | | 0.116 | | 0.637 | | 0.317 | | 0.423 | | 0.372 | | mono | | mono | | 0.495 | | 0.115 | | 0.026* | | 0.524 | | 0.166 | | mono | | 0.861 | | 0.228 | | 0.638 | | mono | | 0.003** | | 0.092 | | 0*** | | 0.11 | | 0.4 | | 0.364 | | 0.528 | | 0.038* | | 0.028* | | mono | | 0.005** | | 0.013* | | 0.532 | | mono | | mono | | 0.387 | | 0.017* | | 0.032* | | 0.079 | | 0.006** | | mono | | 0*** | | 0.018* | | 0.092 | | 0.008** | | 0.565 | | 0.253 | | mono | | 0.02* | | 0.995 | | 0.764 | | 0.637 | | 0.028* | | 0.002** | | 0.619 | | 0.157 | | 0.317 | | 0.44 | | 0.146 | | 0.764 | | 0.214 | | 0.022* | | 0.039* | | 0.053 | | 0.205 | | 0*** | | 0.302 | | 0.053 | | | 0.237 | | --- | | 0.038* | | 0.833 | | mono | | 0.572 | | 0.453 | | 0.019* | | 0.07 | | 0.003** | | 0.968 | | mono | | 0.809 | | 0.955 | | 0.001*** | | 0.009** | | 0.997 | | mono | | 1 | | 0.997 | | 1 | | 0.385 | | 0.989 | | 0.002** | | 1 | | 0.207 | | 0*** | | 0.839 | | 0.941 | | 0.019* | | 0.983 | | 0.025* | | 0.233 | | 0.034* | | 0.029* | | 0.999 | | 1 | | 0.317 | | 1 | | 0.679 | | 0.809 | | 0.132 | | 0.992 | | mono | | 0.961 | | 0.314 | | 0.936 | | 0.376 | | 0.617 | | 0.092 | | 0.462 | | 1 | | 0.014* | | 0.013* | | 0.032* | | 0*** | | 0.526 | | 0.127 | | 0*** | | 0.512 | | 0.353 | | 0.021* | | mono | | 0.909 | | 0.002** | | 0.451 | | 0*** | | 0.908 | | 0.624 | | 0*** | | 0.868 | | 0.017* | | 0.02* | | 0.207 | | 0*** | | 0.945 | | 0.261 | | 0*** | | 0.808 | | 0.63 | | 0.197 | | 0.965 | | 0*** | | 0.671 | | 0.288 | | 0.343 | | 0.001*** | | 0*** | | 0.287 | | 0.572 | | 0.08 | | 0.742 | | 0.944 | | 0.516 | | 0*** | | 0.439 | | 0*** | | 0.114 | | 0*** | | 0*** | | 0*** | | | 0.68 | | --- | | 0.637 | | 0.172 | | 0.564 | | 0.148 | | 0.451 | | 0.708 | | 0.987 | | 0.86 | | 0.479 | | mono | | 0.53 | | 0.319 | | 0.006** | | 0.192 | | 0.86 | | mono | | 0.534 | | 0.86 | | 0.948 | | 0.86 | | 0.895 | | 0.505 | | 0.817 | | mono | | 0.564 | | 0.515 | | 0.587 | | 0.895 | | 0.183 | | 0.611 | | 0.203 | | 0.159 | | 0.019* | | 0.029* | | 0.948 | | 0.174 | | mono | | mono | | mono | | mono | | 0.317 | | 0.82 | | 0.951 | | 0.895 | | 0.922 | | 0.832 | | mono | | 0.731 | | 0.79 | | 0.835 | | mono | | 0.259 | | 0.4 | | 0.002** | | 0.365 | | 0.318 | | 0.006** | | 0.234 | | 0.763 | | 0.707 | | 0.256 | | 0.844 | | 0.03* | | 0.586 | | mono | | 0.261 | | 0.697 | | 0.055 | | 0.469 | | 0.012* | | mono | | 0.17 | | 0.003** | | 0.948 | | 0.659 | | 0.046* | | 0.935 | | 0.878 | | mono | | 0.237 | | 0.767 | | mono | | 0.734 | | 0.076 | | 0.106 | | 1 | | 0.258 | | 0.363 | | 0.161 | | 0.317 | | 0.86 | | 0.317 | | 0.448 | | 0.631 | | 0.075 | | 0.413 | | 0.001*** | | 0.262 | | 0.1 | | | 0.929 | | --- | | 0.261 | | 0.158 | | 0.174 | | 0.375 | | 0.451 | | 0.522 | | 0.13 | | 0.97 | | 0.999 | | mono | | 0.74 | | 0.358 | | 0.16 | | 0.372 | | 0.987 | | 0.989 | | 0.58 | | mono | | 0.994 | | 0.999 | | 0.86 | | 0.025* | | 0.999 | | mono | | 0.349 | | 0.626 | | 0.987 | | 0.767 | | 0.536 | | 0.44 | | 0.85 | | 0.05* | | 0.626 | | 0.344 | | 0.084 | | mono | | mono | | 0.423 | | 0.157 | | 0.317 | | mono | | 0.263 | | 0.815 | | 0.941 | | 0.556 | | 0.334 | | mono | | 0.48 | | 0.031* | | 0.032* | | mono | | 0.6 | | 0.775 | | 0.051 | | 0.551 | | 0.333 | | 0.865 | | 0.117 | | 0.133 | | 0.363 | | 0.147 | | 0.133 | | 0.014* | | 0.521 | | mono | | mono | | 0.297 | | 0.164 | | 0.935 | | 0.374 | | 0.025* | | 0.247 | | 0.017* | | 0.552 | | 0.735 | | mono | | 0.708 | | 0.731 | | mono | | 0.44 | | 0.606 | | mono | | 0.042* | | 0.316 | | 0.174 | | 0.154 | | 0.548 | | 0.451 | | 0.137 | | 0.207 | | 0.038* | | mono | | 0.096 | | 0.827 | | 0.001** | | 0.528 | | 0.052 | | 0.69 | | 0.333 | |

### S7. Mantel test

Mantel test for checking correlation between geographic distance and Fst revealed no significant correlation (p = 0.38)

### S8. Principal Coordinate Analysis (PCoA) of populations based on SSR, EST, EPIC and Combined datasets.


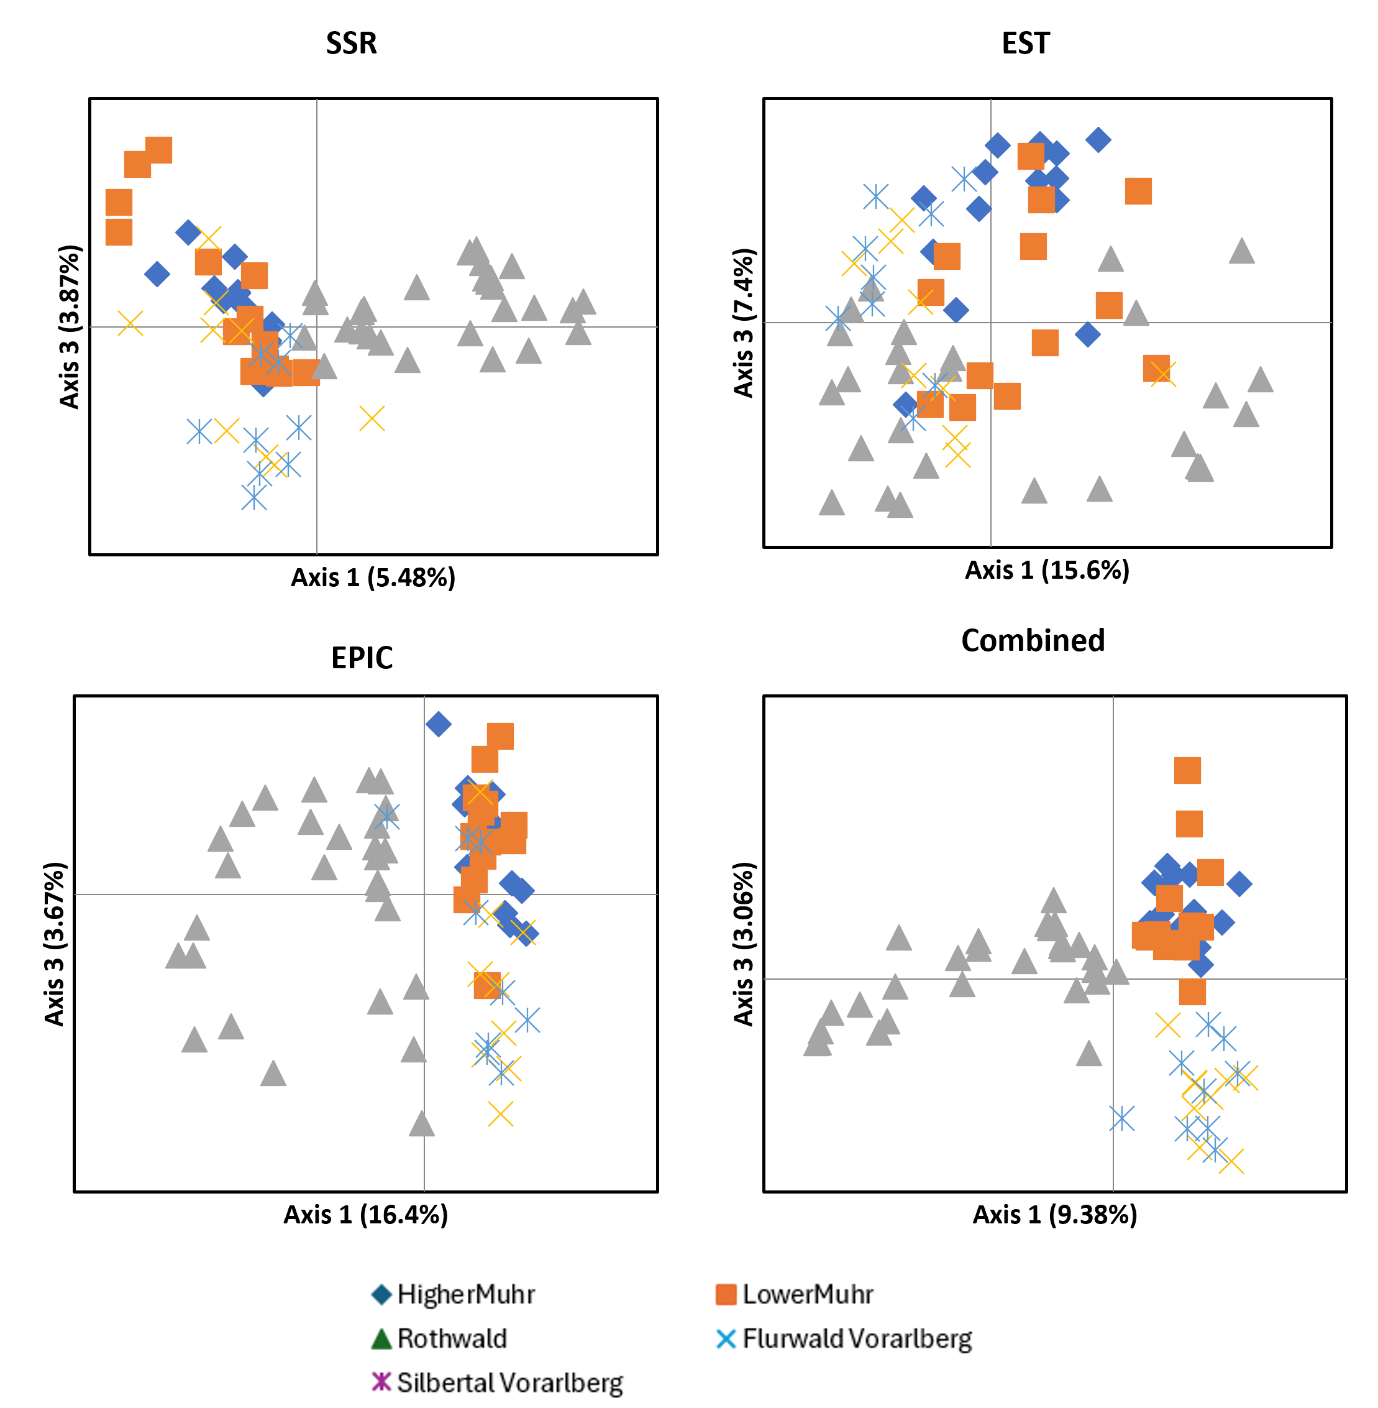


|  |
| --- |
|  |

### References

Morgante M, Pfeiffer A, Costacurta A, Olivieri AM (1996) Molecular tools for population and ecological genetics in coniferous trees. Phyton-Annales Rei Botanicae 36 (3):129-138

Rajora OP, Mann IK (2021) Development and characterization of Novel EST-based single-copy genic microsatellite DNA markers in white spruce and black spruce. Mol Biol Rep 48 (3):2963-2971. doi:10.1007/s11033-021-06231-1

Ranade SS, Lin YC, Van de Peer Y, García-Gil MR (2015) Comparative in silicoanalysis of SSRs in coding regions of high confidence predicted genes in Norway spruce (*Picea abies*) and Loblolly pine (*Pinus taeda*). Bmc Genetics 16. doi:10.1186/s12863-015-0304-y

Rungis D, Bérubé Y, Zhang J, Ralph S, Ritland CE, Ellis BE, Douglas C, Bohlmann J, Ritland K (2004) Robust simple sequence repeat markers for spruce (*Picea* spp.) from expressed sequence tags. Theoretical and Applied Genetics 109 (6):1283-1294. doi:10.1007/s00122-004-1742-5

Scotti I, Magni F, Fink R, Powell W, Binelli G, Hedley P (2000) Microsatellite repeats are not randomly distributed within Norway spruce (*Picea abies* K.) expressed sequences. Genome 43 (1):41-46. doi:10.1139/gen-43-1-41
